# Supplementary material
Source: publisher figshare collection journal article supplement (https://frontiersin.figshare.com/ndownloader/files/35597843)
Supplement: Supplementary file 1 [file 35597843]

## Sheet: Phylum
Taxonomic group	Correlation						p-value						p-value adjusted (Benjamini-Hochberg)
	N	C	K2O	P2O5	pH	Humus	N	C	K2O	P2O5	pH	Humus	N	C	K2O	P2O5	pH	Humus
Abditibacteriota	-0.342327	0.206056	0.594867	0.675999	-0.0800028	0.206033	0.506568	0.69529	0.212951	0.140458	0.880252	0.695323	0.941294	0.89512	0.679315	0.614541	0.920263	0.878963
Acidobacteriota	-0.147244	-0.224232	-0.774572	-0.330646	-0.0173838	-0.220995	0.78073	0.669289	0.0704988	0.522105	0.973927	0.673904	0.941294	0.89512	0.540491	0.817656	0.981134	0.878963
Actinobacteriota	0.118055	-0.584777	0.239342	0.392779	-0.633225	-0.592825	0.82374	0.222821	0.647842	0.44113	0.177116	0.214934	0.941294	0.64061	0.941357	0.817656	0.479255	0.638042
Alphaproteobacteria	-0.102536	0.811274	-0.495887	-0.598797	0.699511	0.81467	0.846735	0.0500651	0.31714	0.209156	0.121874	0.0483379	0.941294	0.383832	0.729423	0.712573	0.459567	0.370591
Armatimonadota	-0.0802356	-0.449448	0.427857	0.6681	-0.711013	-0.457386	0.879905	0.371223	0.397377	0.146956	0.113203	0.361764	0.941294	0.711511	0.794754	0.614541	0.459567	0.69338
Bacteroidota	0.0860572	0.563874	0.09748	-0.316212	0.64926	0.568696	0.871233	0.243832	0.854243	0.541491	0.162954	0.238919	0.941294	0.64765	0.942662	0.817656	0.479255	0.638042
Bdellovibrionota	-0.373714	0.343434	0.191508	0.287465	0.373449	0.349926	0.465525	0.505103	0.71625	0.58068	0.465867	0.496536	0.941294	0.774491	0.941357	0.817656	0.828335	0.766065
Caldatribacteriota	-0.342327	0.206056	0.594867	0.675999	-0.0800028	0.206033	0.506568	0.69529	0.212951	0.140458	0.880252	0.695323	0.941294	0.89512	0.679315	0.614541	0.920263	0.878963
Chloroflexi	-0.164414	0.106772	-0.0911552	0.0830639	-0.299723	0.105021	0.755601	0.840451	0.863646	0.875691	0.563878	0.843048	0.941294	0.920494	0.942662	0.980213	0.852269	0.923338
Crenarchaeota	0.769509	-0.517851	0.282541	-0.340305	-0.25617	-0.522228	0.0735664	0.29266	0.587466	0.509247	0.62415	0.28787	0.941294	0.64765	0.941357	0.817656	0.86556	0.638042
Cyanobacteria	-0.111293	-0.770183	0.589246	0.834783	-0.885494	-0.771894	0.83375	0.0731547	0.218427	0.0386902	0.0189166	0.0721139	0.941294	0.425725	0.679315	0.53496	0.333408	0.438007
Dependentiae	0.176328	0.585521	-0.1681	-0.43637	0.689208	0.580583	0.738249	0.222087	0.750225	0.386992	0.129878	0.226976	0.941294	0.64061	0.942662	0.817656	0.459567	0.638042
Desulfobacterota	-0.384527	-0.754795	-0.192516	0.498962	-0.52031	-0.750367	0.451638	0.0828165	0.714794	0.313669	0.289964	0.085697	0.941294	0.425725	0.941357	0.801599	0.666918	0.438007
Elusimicrobiota	-0.278206	-0.594237	0.0340717	0.589627	-0.398974	-0.596497	0.593458	0.213562	0.948912	0.218054	0.433293	0.211374	0.941294	0.64061	0.95782	0.712573	0.828335	0.638042
Entotheonellaeota	-0.185768	0.199003	-0.0781901	0.0287739	-0.179426	0.20035	0.724553	0.705436	0.882954	0.956851	0.733749	0.703497	0.941294	0.89512	0.942662	0.987804	0.888223	0.878963
Euryarchaeota	-0.727561	-0.399394	-0.0656429	0.851459	-0.477923	-0.398084	0.101224	0.432764	0.901677	0.031458	0.337697	0.434416	0.941294	0.76566	0.942662	0.53496	0.739717	0.766065
FCPU426	-0.242069	-0.384596	-0.580989	-0.0701302	0.10949	-0.378685	0.643989	0.451549	0.226573	0.894977	0.836421	0.459124	0.941294	0.769306	0.679315	0.980213	0.920263	0.766065
Fibrobacterota	-0.654045	-0.203313	-0.264811	0.538429	0.097952	-0.199509	0.158825	0.699233	0.612068	0.270404	0.853542	0.704706	0.941294	0.89512	0.941357	0.731681	0.920263	0.878963
Firmicutes	0.143657	-0.346125	0.665101	0.461705	-0.221467	-0.347594	0.785997	0.501546	0.149456	0.356654	0.673231	0.499608	0.941294	0.774491	0.679315	0.817656	0.86556	0.766065
Fusobacteriota	-0.448871	0.887741	-0.354337	-0.177998	0.877055	0.89215	0.371914	0.0181957	0.490739	0.735823	0.021744	0.0168201	0.941294	0.279001	0.90296	0.867894	0.333408	0.257908
GAL15	-0.576431	-0.110968	-0.549968	0.283183	0.162662	-0.11057	0.23112	0.834232	0.258221	0.58658	0.758159	0.834821	0.941294	0.920494	0.679315	0.817656	0.894238	0.923338
Gammaproteobacteria	-0.293256	0.911267	-0.450937	-0.418392	0.912141	0.915778	0.572725	0.0114611	0.369442	0.409032	0.0112398	0.0103412	0.941294	0.263605	0.793195	0.817656	0.333408	0.237847
Gemmatimonadota	-0.427205	-0.506377	-0.383436	0.396777	-0.448229	-0.507002	0.398176	0.305357	0.453033	0.436067	0.372683	0.304659	0.941294	0.64765	0.868312	0.817656	0.765035	0.638042
Halanaerobiaeota	-0.677234	0.35329	0.195813	0.688232	0.21855	0.354538	0.139454	0.492113	0.710035	0.130647	0.677395	0.490475	0.941294	0.774491	0.941357	0.614541	0.86556	0.766065
Halobacterota	0.306652	-0.826345	0.0869227	-0.00813059	-0.440062	-0.821927	0.554441	0.0426159	0.869944	0.987804	0.382517	0.0447415	0.941294	0.383832	0.942662	0.987804	0.765035	0.370591
Hydrogenedentes	0.404176	0.0333151	0.113128	-0.308893	0.353642	0.0308928	0.426748	0.950046	0.831031	0.551398	0.491651	0.953675	0.941294	0.950456	0.942662	0.817656	0.828335	0.953675
Latescibacterota	-0.399101	0.0330416	-0.221773	0.251817	-0.311586	0.032569	0.433133	0.950456	0.672794	0.630258	0.547747	0.951164	0.941294	0.950456	0.941357	0.846931	0.852269	0.953675
MBNT15	-0.784033	0.688695	-0.542747	0.127294	0.76554	0.69314	0.0649262	0.130282	0.265819	0.810091	0.076013	0.126797	0.941294	0.544814	0.679315	0.931604	0.459567	0.530242
Methylomirabilota	-0.334834	-0.595115	0.116559	0.680813	-0.785576	-0.596869	0.516519	0.212711	0.825954	0.136561	0.064037	0.211015	0.941294	0.64061	0.942662	0.614541	0.459567	0.638042
Myxococcota	0.211646	-0.840092	0.580186	0.575193	-0.855349	-0.845223	0.687272	0.0363112	0.227371	0.232361	0.0298726	0.0340802	0.941294	0.383832	0.679315	0.712573	0.343535	0.370591
Nanoarchaeota	-0.382098	-0.151409	-0.813221	-0.212569	0.147693	-0.14337	0.454745	0.774623	0.0490714	0.68595	0.780072	0.786418	0.941294	0.906006	0.540491	0.866224	0.897083	0.908193
NB1.j	0.291042	0.142408	-0.678412	-0.792098	0.358225	0.141115	0.575764	0.787832	0.138499	0.0603418	0.485647	0.789733	0.941294	0.906006	0.679315	0.555144	0.828335	0.908193
Nitrospirota	0.179769	-0.754056	0.781743	0.629139	-0.75781	-0.754133	0.733251	0.0832941	0.0662556	0.180803	0.0808807	0.0832444	0.941294	0.425725	0.540491	0.693079	0.459567	0.438007
Patescibacteria	0.549583	-0.517829	0.645642	0.205043	-0.738962	-0.527397	0.258624	0.292683	0.166106	0.696745	0.0933177	0.282252	0.941294	0.64765	0.679315	0.866224	0.459567	0.638042
Planctomycetota	-0.875125	0.051774	-0.734935	0.31292	0.248118	0.0578636	0.0224171	0.922408	0.0960775	0.545941	0.63546	0.913301	0.941294	0.950456	0.631367	0.817656	0.86556	0.953675
RCP2.54	0.596516	-0.426383	0.831949	0.241775	-0.635813	-0.435592	0.211356	0.399185	0.0399888	0.644404	0.174797	0.387936	0.941294	0.7345	0.540491	0.846931	0.479255	0.713803
SAR324.clade.Marine.group.B.	0.230991	0.730496	-0.519791	-0.861833	0.718396	0.729652	0.659675	0.0991611	0.290533	0.0273164	0.107786	0.0997522	0.941294	0.456141	0.703395	0.53496	0.459567	0.45886
Spirochaetota	-0.0186112	-0.634134	-0.100384	0.18016	-0.192231	-0.632247	0.972086	0.1763	0.84993	0.732683	0.715206	0.177996	0.976937	0.64061	0.942662	0.867894	0.888223	0.638042
Sumerlaeota	0.719853	-0.0412646	0.847961	-0.0484242	-0.292068	-0.0491367	0.10673	0.938138	0.0329164	0.927421	0.574355	0.926354	0.941294	0.950456	0.540491	0.987804	0.852269	0.953675
Thermoplasmatota	-0.17741	-0.502452	0.547164	0.818309	-0.526627	-0.506562	0.736677	0.309746	0.261162	0.0465183	0.283085	0.305151	0.941294	0.64765	0.679315	0.53496	0.666918	0.638042
TX1A.33	-0.538445	-0.239321	-0.442681	0.375921	0.0125779	-0.239647	0.270386	0.647872	0.379354	0.462681	0.981134	0.647411	0.941294	0.89512	0.793195	0.817656	0.981134	0.878963
Unclassified	0.0153764	-0.955916	0.279236	0.551418	-0.834658	-0.956457	0.976937	0.00287232	0.592032	0.256706	0.0387467	0.00280266	0.976937	0.132127	0.941357	0.731681	0.35647	0.128923
Unresolved_Proteobacteria	-0.538596	-0.548314	-0.0281275	0.721493	-0.655537	-0.546345	0.270225	0.259954	0.95782	0.105548	0.157546	0.262022	0.941294	0.64765	0.95782	0.614541	0.479255	0.638042
Verrucomicrobiota	0.399535	-0.488828	0.959495	0.4586	-0.590953	-0.491667	0.432585	0.325161	0.00242772	0.360325	0.216759	0.321926	0.941294	0.650322	0.111675	0.817656	0.553939	0.643853
WPS.2	-0.166376	-0.188797	-0.278116	-0.0164779	-0.344114	-0.1847	0.752739	0.720169	0.593581	0.975285	0.504204	0.7261	0.941294	0.89512	0.941357	0.987804	0.828335	0.878963
WS2	-0.0598199	0.175504	-0.240514	-0.323936	0.2363	0.185046	0.910377	0.739447	0.646186	0.531093	0.652147	0.725599	0.951758	0.89512	0.941357	0.817656	0.86556	0.878963

## Sheet: Genus
Taxonomic group	Correlation						p-value						p-value adjusted (Benjamini-Hochberg)
	N	C	K2O	P2O5	pH	Humus	N	C	K2O	P2O5	pH	Humus	N	C	K2O	P2O5	pH	Humus
Pseudarthrobacter	-0.221498	-0.597453	0.564723	0.894532	-0.668222	-0.600578	0.673187	0.210451	0.242964	0.0160986	0.146854	0.207446	0.92615	0.681391	0.631979	0.647379	0.522056	0.67166
Chryseolinea	0.790461	-0.307607	0.595078	-0.307554	-0.144757	-0.307603	0.0612596	0.553143	0.212747	0.553215	0.784382	0.553149	0.912363	0.884399	0.583411	0.816773	0.972689	0.881994
Nitrospira	0.179769	-0.754056	0.781743	0.629139	-0.75781	-0.754133	0.733251	0.0832941	0.0662556	0.180803	0.0808807	0.0832444	0.940663	0.360422	0.420403	0.647379	0.340811	0.360233
Candidatus.Xiphinematobacter	0.752905	0.0933977	0.329711	-0.575448	0.285488	0.091966	0.0840407	0.860311	0.523355	0.232106	0.583402	0.86244	0.912363	0.973897	0.839461	0.647379	0.960351	0.971556
Microvirga	0.36476	0.683407	-0.297935	-0.843412	0.578699	0.682851	0.477125	0.134481	0.56632	0.0348598	0.228853	0.134926	0.912363	0.518724	0.839461	0.647379	0.683605	0.520411
Agromyces	0.271521	-0.592996	0.819547	0.467459	-0.685244	-0.591563	0.602728	0.214768	0.0459068	0.349886	0.133015	0.216163	0.912363	0.688742	0.420403	0.710513	0.492688	0.675645
Bradyrhizobium	-0.565795	-0.00449733	-0.254802	0.330814	-0.222294	0.000685479	0.24187	0.993254	0.626069	0.521881	0.672051	0.998972	0.912363	0.996973	0.879529	0.81632	0.972689	0.999161
Sphingomonas	-0.232344	0.87327	-0.624695	-0.569421	0.981544	0.877041	0.657756	0.0230729	0.184849	0.238183	0.000507805	0.0217488	0.92615	0.258814	0.582212	0.652537	0.0123631	0.249369
Candidatus.Udaeobacter	0.550212	0.166887	0.312695	-0.480927	0.331568	0.170186	0.257966	0.751994	0.546245	0.334226	0.520874	0.747185	0.912363	0.921093	0.839461	0.710513	0.933453	0.917631
Bacillus	0.223001	-0.303074	0.841374	0.474982	-0.310844	-0.304511	0.671043	0.559308	0.0357478	0.341107	0.548752	0.557352	0.92615	0.884399	0.420403	0.710513	0.960351	0.881994
Pseudonocardia	-0.410164	-0.274634	-0.318939	0.352254	-0.446181	-0.276917	0.419256	0.598406	0.537813	0.493474	0.375141	0.595243	0.912363	0.884399	0.839461	0.804455	0.838396	0.881994
Puia	-0.233887	0.892928	-0.680977	-0.591019	0.951598	0.895226	0.655566	0.0165827	0.136429	0.216694	0.00345747	0.0158913	0.92615	0.258814	0.489664	0.647379	0.0228687	0.249369
Ilumatobacter	-0.0352751	0.236644	-0.788122	-0.682363	0.404002	0.242696	0.947109	0.651661	0.0625825	0.135316	0.426967	0.643104	0.971198	0.884399	0.420403	0.647379	0.866548	0.881994
RB41	-0.269486	0.0990646	-0.801888	-0.433512	0.508781	0.108242	0.605556	0.851889	0.0549848	0.390467	0.302679	0.838271	0.912363	0.969102	0.420403	0.72709	0.77736	0.95596
Gaiella	0.38564	-0.603101	0.478407	0.271371	-0.506184	-0.610304	0.450216	0.205032	0.337136	0.602936	0.305571	0.198205	0.912363	0.677277	0.755854	0.817586	0.77736	0.655491
Bryobacter	0.110931	-0.804964	0.414782	0.547398	-0.696162	-0.809264	0.834286	0.053349	0.413508	0.260915	0.124452	0.0511006	0.946626	0.276193	0.821692	0.673575	0.468464	0.264214
Nocardioides	0.501251	-0.309909	0.969601	0.352858	-0.602395	-0.317006	0.311094	0.550019	0.00137213	0.492679	0.205706	0.540419	0.912363	0.884399	0.420403	0.804455	0.651067	0.881994
Tychonema.CCAP.1459.11B	0.542293	-0.725913	0.784969	0.238571	-0.79026	-0.726226	0.2663	0.10239	0.0643861	0.648933	0.0613728	0.102168	0.912363	0.416499	0.420403	0.848559	0.27588	0.414946
Mycobacterium	-0.103015	0.795222	-0.436844	-0.547466	0.630111	0.798206	0.846024	0.0586075	0.386416	0.260844	0.179924	0.0569728	0.948449	0.282659	0.79164	0.673575	0.608063	0.28115
Acidibacter	0.529508	0.558528	0.211577	-0.539824	0.528635	0.553141	0.27997	0.249325	0.687371	0.268919	0.280912	0.254909	0.912363	0.725803	0.879529	0.673575	0.760598	0.731548
Reyranella	-0.469352	0.214207	0.0290533	0.305651	0.011916	0.221397	0.34767	0.683603	0.956432	0.555801	0.982127	0.67333	0.912363	0.884399	0.981616	0.816773	0.999138	0.881994
Intrasporangium	0.0980626	0.12058	0.584403	0.195965	0.137672	0.123712	0.853378	0.820007	0.22319	0.709815	0.794796	0.815379	0.949938	0.945287	0.600796	0.871736	0.972689	0.943801
Flavitalea	0.122685	0.521305	-0.00209051	-0.431765	0.61223	0.527656	0.816896	0.288877	0.996864	0.392597	0.196395	0.281971	0.940853	0.731344	0.997812	0.72709	0.631464	0.738979
ADurb.Bin063.1	-0.30929	-0.487735	0.120992	0.535549	-0.692585	-0.484719	0.550858	0.326409	0.819398	0.273477	0.12723	0.329865	0.912363	0.748156	0.925135	0.673575	0.475061	0.750599
Nordella	-0.765256	0.198664	-0.418946	0.370175	-0.0182291	0.202817	0.0761893	0.705925	0.408346	0.470101	0.972659	0.699946	0.912363	0.887754	0.818461	0.791478	0.999138	0.881994
Ferruginibacter	0.109625	0.672906	-0.440936	-0.750519	0.859592	0.678107	0.836221	0.142988	0.381461	0.0855975	0.0281874	0.138746	0.946626	0.538239	0.788466	0.647379	0.147874	0.522271
Thermomonas	-0.173513	0.831596	-0.643702	-0.638671	0.957432	0.836008	0.742343	0.0401517	0.167807	0.172251	0.00267944	0.0381349	0.940663	0.258814	0.548001	0.647379	0.0190859	0.249369
Adhaeribacter	0.105396	0.514566	-0.407705	-0.694068	0.754297	0.521748	0.842491	0.296274	0.422328	0.126075	0.0831384	0.288394	0.94678	0.731344	0.828069	0.647379	0.343688	0.738979
CL500.29.marine.group	-0.263317	0.404351	-0.666755	-0.253268	0.454473	0.399983	0.614153	0.42653	0.148074	0.628221	0.365225	0.432022	0.912363	0.824604	0.516234	0.831046	0.838396	0.819374
MND1	-0.232676	-0.744924	0.323259	0.773195	-0.880819	-0.746714	0.657284	0.0892975	0.532002	0.0713273	0.0204597	0.0881062	0.92615	0.37931	0.839461	0.647379	0.112772	0.374249
Skermanella	0.149513	0.223478	0.722188	0.346667	-0.25822	0.216319	0.777401	0.670364	0.105048	0.50083	0.621278	0.680582	0.940853	0.884399	0.420403	0.809622	0.972689	0.881994
Ramlibacter	-0.547446	-0.211978	-0.0777481	0.461463	0.0445583	-0.20263	0.260865	0.686796	0.883613	0.356939	0.933207	0.700215	0.912363	0.884399	0.952059	0.713689	0.978135	0.881994
Pontibacter	-0.403796	0.120122	0.449626	0.723499	0.0136015	0.117661	0.427226	0.820684	0.37101	0.10411	0.979599	0.824323	0.912363	0.945287	0.785051	0.647379	0.999138	0.949407
Rhodoplanes	0.454694	-0.581676	0.76034	0.394657	-0.72359	-0.590263	0.364962	0.22589	0.0792726	0.438749	0.104044	0.217432	0.912363	0.69263	0.420403	0.756679	0.411731	0.675645
Lysobacter	-0.269705	0.911327	-0.518669	-0.486709	0.900629	0.915651	0.605252	0.0114456	0.291762	0.327584	0.0143213	0.0103721	0.912363	0.258814	0.703571	0.710513	0.0819067	0.249369
Candidatus.Nitrocosmicus	0.957441	-0.509363	0.44856	-0.450475	-0.40427	-0.512887	0.00267833	0.302032	0.372287	0.369994	0.426631	0.298128	0.912363	0.731344	0.785051	0.722816	0.866548	0.738979
Flavisolibacter	0.789961	0.232963	0.365684	-0.546426	0.166081	0.225073	0.0615414	0.656877	0.475925	0.261938	0.753169	0.668091	0.912363	0.884399	0.839461	0.673575	0.972689	0.881994
Nakamurella	-0.261906	0.369211	-0.752573	-0.405163	0.756815	0.372018	0.616123	0.471348	0.0842564	0.42551	0.0815176	0.467717	0.912363	0.826802	0.420403	0.754833	0.340811	0.826537
Clostridium.sensu.stricto.13	0.734532	-0.110529	0.199813	-0.61912	0.189481	-0.10855	0.0963554	0.834882	0.704269	0.189977	0.719179	0.837814	0.912363	0.956585	0.881288	0.647379	0.972689	0.95596
Rubrobacter	-0.612739	-0.216584	-0.45808	0.432056	-0.284385	-0.217536	0.195918	0.680203	0.360941	0.392242	0.584922	0.678843	0.912363	0.884399	0.777283	0.72709	0.960351	0.881994
Pseudaminobacter	0.0236007	0.81905	-0.31982	-0.551179	0.558488	0.818217	0.964606	0.0461521	0.536627	0.256955	0.249367	0.0465641	0.983728	0.258814	0.839461	0.673575	0.722991	0.249369
Pedomicrobium	0.0539207	-0.510847	0.108742	0.160202	-0.683323	-0.508243	0.919197	0.300386	0.83753	0.761752	0.134548	0.303278	0.96731	0.731344	0.931571	0.902024	0.49441	0.738979
Nitrosospira	0.208887	-0.634367	0.71174	0.472627	-0.520133	-0.63219	0.691226	0.176091	0.112664	0.343847	0.290158	0.178047	0.92615	0.618384	0.424093	0.710513	0.766143	0.615192
Streptomyces	0.262898	-0.828316	0.574972	0.452554	-0.63484	-0.829296	0.614737	0.0416827	0.232583	0.367512	0.175667	0.0412225	0.912363	0.258814	0.61587	0.721009	0.598044	0.249369
Solitalea	-0.111971	0.779377	-0.644324	-0.68388	0.956272	0.783895	0.832745	0.0676422	0.16726	0.134102	0.00282634	0.0650059	0.946626	0.313183	0.548001	0.647379	0.0197469	0.301233
mle1.7	-0.199827	0.450982	0.00717752	-0.0178002	0.0815513	0.453764	0.70425	0.369389	0.989234	0.973302	0.877944	0.36607	0.927795	0.802943	0.997812	0.986781	0.972689	0.799483
Blastococcus	0.11936	-0.0836051	-0.0808627	-0.00368653	-0.29592	-0.0928635	0.821811	0.874885	0.87897	0.99447	0.569077	0.861105	0.942268	0.974228	0.950849	0.99447	0.960351	0.971556
Terrimonas	-0.074181	0.280097	0.149676	-0.0549886	0.170545	0.287504	0.888933	0.590843	0.777162	0.9176	0.746663	0.580626	0.949938	0.884399	0.899346	0.972908	0.972689	0.881994
Dinghuibacter	0.0461524	0.80208	-0.231523	-0.580553	0.828307	0.806291	0.930821	0.054882	0.65892	0.227006	0.0416869	0.0526506	0.971198	0.277163	0.879529	0.647379	0.203169	0.267881
Luteolibacter	0.124766	0.611357	-0.348925	-0.675428	0.858177	0.616406	0.813822	0.197214	0.497853	0.140924	0.0287445	0.192495	0.940853	0.656906	0.839461	0.647379	0.147874	0.650549
Chthoniobacter	0.23474	0.630128	-0.115587	-0.642006	0.710171	0.634849	0.654357	0.179908	0.827392	0.1693	0.113828	0.175659	0.92615	0.621623	0.925135	0.647379	0.439187	0.615192
Marmoricola	0.0134382	-0.193749	0.189287	0.340601	-0.470413	-0.203578	0.979844	0.713013	0.71946	0.508855	0.346429	0.698852	0.986234	0.89223	0.885931	0.809622	0.835398	0.881994
Afipia	0.501339	0.0219377	-0.243296	-0.733544	-0.00882191	0.0236308	0.310994	0.967099	0.642256	0.0970393	0.986767	0.96456	0.912363	0.996973	0.879529	0.647379	0.999138	0.995323
Stenotrophobacter	-0.318185	0.355332	-0.805478	-0.45794	0.756863	0.363054	0.538829	0.489434	0.0530778	0.361107	0.081487	0.479346	0.912363	0.84611	0.420403	0.717564	0.340811	0.837498
Ellin6055	-0.559828	0.766987	-0.477721	0.0131361	0.696196	0.764562	0.247985	0.0751167	0.33793	0.980297	0.124425	0.0766211	0.912363	0.336572	0.755854	0.990999	0.468464	0.341111
Pseudorhodoplanes	-0.0743666	0.581762	-0.755254	-0.678889	0.546204	0.583042	0.888656	0.225805	0.0825207	0.138113	0.262171	0.224536	0.949938	0.69263	0.420403	0.647379	0.731235	0.688478
Haliangium	0.152188	-0.876364	0.42454	0.531571	-0.934527	-0.880737	0.773481	0.0219838	0.401448	0.277746	0.00628975	0.0204872	0.940853	0.258814	0.815222	0.673575	0.0388287	0.249369
Subgroup.10	-0.0832406	0.134434	-0.00212524	0.0410138	-0.290861	0.133005	0.875427	0.799563	0.996812	0.938514	0.576012	0.801669	0.949938	0.9361	0.997812	0.972908	0.960351	0.941239
Opitutus	0.330259	-0.590234	0.7634	0.485742	-0.568182	-0.595657	0.522622	0.217461	0.0773469	0.328691	0.23944	0.212186	0.912363	0.688742	0.420403	0.710513	0.701651	0.675645
Paenibacillus	0.505825	-0.411434	0.228205	-0.0890904	-0.242323	-0.419024	0.305972	0.417673	0.663635	0.866718	0.64363	0.40825	0.912363	0.824604	0.879529	0.957734	0.972689	0.819374
Massilia	-0.222182	0.846867	-0.672559	-0.610895	0.956007	0.851132	0.672211	0.0333792	0.143273	0.197648	0.00286053	0.0315928	0.92615	0.258814	0.506377	0.647379	0.0197469	0.249369
BIyi10	0.297416	-0.0184923	0.799673	0.209311	-0.19168	-0.0173437	0.56703	0.972265	0.0561769	0.690619	0.716001	0.973987	0.912363	0.996973	0.420403	0.864717	0.972689	0.99769
Solirubrobacter	0.116429	-0.260268	-0.190545	-0.0294456	-0.361714	-0.267955	0.826146	0.618413	0.717642	0.955844	0.481092	0.607687	0.942268	0.884399	0.885931	0.979106	0.912425	0.881994
Roseimicrobium	-0.443096	-0.552554	-0.46841	0.284338	-0.395473	-0.5476	0.378854	0.25552	0.348772	0.584987	0.437717	0.260703	0.912363	0.725803	0.765315	0.816773	0.866548	0.731548
Iamia	0.41098	-0.777332	0.207267	0.097359	-0.595487	-0.78257	0.418239	0.0688516	0.693552	0.854423	0.212351	0.0657744	0.912363	0.315626	0.879529	0.948676	0.664313	0.30152
Amaricoccus	0.233658	-0.258955	0.83243	0.445538	-0.653957	-0.261671	0.655891	0.62025	0.0397669	0.375913	0.1589	0.616452	0.92615	0.884399	0.420403	0.724138	0.557353	0.881994
Pedobacter	-0.334613	0.697805	0.0638015	0.0521806	0.613005	0.702348	0.516813	0.123184	0.904428	0.9218	0.195668	0.11971	0.912363	0.487471	0.960436	0.972908	0.631464	0.473724
Allorhizobium.Neorhizobium.Pararhizobium.Rhizobium	-0.171933	-0.0110193	0.717486	0.718122	-0.44763	-0.0148036	0.744641	0.983472	0.108447	0.107984	0.373401	0.977796	0.940663	0.996973	0.420403	0.647379	0.838396	0.998104
Leptothrix	-0.400677	0.797496	0.10439	0.178016	0.581257	0.797735	0.431148	0.0573597	0.843984	0.735797	0.226306	0.0572293	0.912363	0.282659	0.933537	0.882576	0.683605	0.28115
Rhizobacter	-0.412955	0.230714	0.332596	0.6714	-0.0591646	0.224204	0.415779	0.660069	0.519502	0.144226	0.911357	0.669329	0.912363	0.884399	0.839461	0.647379	0.978135	0.881994
Ellin6067	0.481825	0.505543	0.192176	-0.433682	0.206022	0.496546	0.333192	0.306288	0.715284	0.39026	0.695339	0.316395	0.912363	0.731344	0.885644	0.72709	0.972689	0.739852
Mesorhizobium	0.603926	0.167117	-0.392188	-0.958124	0.438699	0.167179	0.204245	0.751658	0.441879	0.00259374	0.384167	0.751568	0.912363	0.921093	0.837221	0.647379	0.838396	0.920571
Arenimonas	-0.267913	0.795474	-0.633904	-0.543536	0.941482	0.801438	0.607746	0.0584687	0.176506	0.264984	0.00503635	0.0552259	0.912363	0.282659	0.567517	0.673575	0.0320886	0.27793
Lapillicoccus	-0.525331	0.694941	-0.546652	-0.129361	0.894343	0.698388	0.284492	0.125397	0.261699	0.807041	0.0161553	0.122736	0.912363	0.492024	0.658515	0.920345	0.0901195	0.481581
Flavobacterium	0.238327	0.349283	-0.0773534	-0.533353	0.616066	0.355703	0.649278	0.497382	0.884201	0.275831	0.192811	0.488948	0.92615	0.851835	0.952059	0.673575	0.631464	0.844201
Altererythrobacter	0.455942	0.438254	0.133166	-0.594632	0.585124	0.4408	0.363478	0.384706	0.801432	0.213179	0.222479	0.381624	0.912363	0.824604	0.911703	0.647379	0.683605	0.818019
Kribbella	0.166471	-0.324951	0.272762	0.0812457	0.0540058	-0.320884	0.7526	0.52973	0.601003	0.8784	0.91907	0.535195	0.940853	0.876913	0.864176	0.963573	0.978135	0.881994
JGI.0001001.H03	-0.160245	0.669221	-0.65709	-0.604537	0.952687	0.674308	0.761691	0.146026	0.15622	0.203663	0.00330488	0.141839	0.940853	0.545244	0.535777	0.647379	0.0221763	0.529609
Paenisporosarcina	0.0806714	-0.229494	0.73406	0.511042	-0.190655	-0.230001	0.879255	0.661803	0.0966822	0.30017	0.717483	0.661082	0.949938	0.884399	0.420403	0.710513	0.972689	0.881994
Dongia	0.000280886	0.295349	-0.318733	-0.416262	0.129529	0.300122	0.999579	0.569859	0.538091	0.41167	0.806792	0.563333	0.999646	0.884399	0.839461	0.746086	0.972689	0.881994
Ohtaekwangia	0.178552	-0.370028	0.869633	0.534173	-0.441902	-0.369687	0.735018	0.470291	0.0243856	0.274952	0.380294	0.470731	0.940663	0.826802	0.420403	0.673575	0.838396	0.828702
Gemmatimonas	-0.578933	0.399021	-0.809341	-0.186571	0.372975	0.404752	0.228619	0.433234	0.051061	0.72339	0.46648	0.426026	0.912363	0.824604	0.420403	0.880498	0.896183	0.819374
Litorilinea	-0.781533	-0.145693	-0.684281	0.300457	0.0577483	-0.138209	0.0663785	0.783006	0.133783	0.562877	0.913474	0.794006	0.912363	0.934005	0.483917	0.816773	0.978135	0.940217
Microlunatus	-0.250139	0.275682	-0.342392	-0.0112194	-0.0618455	0.271116	0.632616	0.596954	0.506481	0.983172	0.90735	0.603291	0.923979	0.884399	0.839461	0.99174	0.978135	0.881994
Steroidobacter	-0.591009	0.421454	0.160784	0.622829	0.210936	0.417992	0.216703	0.405249	0.760902	0.186559	0.688289	0.409527	0.912363	0.824604	0.893265	0.647379	0.972689	0.819374
Pseudomonas	0.662844	-0.0470068	0.665159	-0.0647136	-0.27023	-0.0575268	0.151348	0.929542	0.149407	0.903065	0.604522	0.913805	0.912363	0.980359	0.516234	0.972908	0.972689	0.979379
Parasegetibacter	0.39085	0.020929	-0.331164	-0.604434	0.420842	0.0194523	0.443579	0.968611	0.521413	0.203761	0.406005	0.970825	0.912363	0.996973	0.839461	0.647379	0.849669	0.996656
Candidatus.Solibacter	-0.369775	-0.682055	-0.306346	0.390609	-0.555835	-0.67864	0.470617	0.135563	0.554856	0.443886	0.25211	0.138315	0.912363	0.518724	0.839461	0.756679	0.722991	0.522271
Pseudoxanthomonas	0.321516	0.145761	0.340254	-0.251565	0.0182697	0.150654	0.534344	0.782907	0.509314	0.630613	0.972599	0.775728	0.912363	0.934005	0.839461	0.831834	0.999138	0.934072
Psychroglaciecola	0.146351	-0.374041	-0.391288	-0.268125	-0.390859	-0.374701	0.782041	0.465104	0.443022	0.607451	0.443568	0.464253	0.940853	0.826802	0.837221	0.817586	0.866548	0.823559
Cellulomonas	0.0137395	0.586941	0.166617	-0.19873	0.350835	0.590768	0.979392	0.220689	0.752387	0.705829	0.495339	0.21694	0.986234	0.688742	0.893265	0.871736	0.926852	0.675645
Rhizocola	0.0848984	-0.922027	0.348327	0.441633	-0.79481	-0.918349	0.872958	0.00888254	0.49864	0.380618	0.0588347	0.0097281	0.949938	0.258814	0.839461	0.724138	0.267063	0.249369
Knoellia	0.406184	-0.0041463	0.392986	-0.0381274	-0.446219	-0.0126262	0.424232	0.993781	0.440867	0.942837	0.375096	0.981062	0.912363	0.996973	0.837221	0.974405	0.838396	0.998311
Longispora	-0.263266	0.831295	-0.22624	-0.277168	0.680025	0.836024	0.614225	0.0402915	0.666431	0.594894	0.137196	0.0381279	0.912363	0.258814	0.879529	0.816773	0.499424	0.249369
Pajaroellobacter	0.311769	-0.0806458	0.492789	0.215352	-0.326	-0.0920083	0.547499	0.879294	0.320651	0.681966	0.528323	0.862377	0.912363	0.974228	0.749804	0.860355	0.940821	0.971556
alphaI.cluster	0.615809	0.329548	-0.14726	-0.852226	0.580765	0.328733	0.19305	0.523573	0.780707	0.031142	0.226795	0.524663	0.912363	0.876913	0.899346	0.647379	0.683605	0.88014
Lacibacter	0.332991	0.135124	0.392183	-0.228764	0.121439	0.140574	0.518975	0.798548	0.441885	0.66284	0.818737	0.790528	0.912363	0.9361	0.837221	0.850124	0.972689	0.939705
Xylophilus	-0.184397	0.00348424	-0.0824502	-0.0351856	0.151527	0.0141992	0.726539	0.994774	0.876605	0.947243	0.77445	0.978703	0.940663	0.996973	0.950849	0.9748	0.972689	0.998104
Ellin517	0.0370124	-0.467452	0.875526	0.774005	-0.650159	-0.470332	0.944507	0.349894	0.0222762	0.0708395	0.162175	0.346524	0.971198	0.772384	0.420403	0.647379	0.56035	0.7711
Williamsia	-0.618286	0.822112	-0.592852	-0.135037	0.902082	0.826699	0.190749	0.0446515	0.214908	0.798676	0.0139123	0.0424473	0.912363	0.258814	0.585309	0.917367	0.0815369	0.249369
Methylotenera	0.615335	0.0947154	0.183052	-0.604826	0.349884	0.0979117	0.193492	0.858352	0.728488	0.203388	0.496591	0.853602	0.912363	0.973897	0.886958	0.647379	0.926852	0.968671
UTCFX1	-0.300508	-0.566247	-0.0557467	0.546332	-0.380352	-0.568819	0.562807	0.241409	0.916467	0.262036	0.456984	0.238794	0.912363	0.723505	0.96657	0.673575	0.883129	0.716245
Phaselicystis	0.0690475	-0.877558	0.0694589	0.338316	-0.619556	-0.878706	0.896593	0.0215702	0.895979	0.511888	0.189574	0.021176	0.949938	0.258814	0.953651	0.811657	0.63146	0.249369
Catellatospora	0.544652	-0.735275	0.735245	0.259867	-0.922284	-0.739134	0.263806	0.0958431	0.0958635	0.618975	0.00882504	0.0932004	0.912363	0.399778	0.420403	0.828281	0.0537631	0.388755
Archangium	0.137467	0.727559	-0.0808914	-0.461949	0.833553	0.726926	0.795098	0.101226	0.878927	0.356365	0.039251	0.101673	0.940853	0.416499	0.950849	0.713689	0.193332	0.414946
Devosia	-0.515941	0.736488	-0.174184	0.0567847	0.507647	0.741298	0.294759	0.0950091	0.741366	0.914915	0.303941	0.091733	0.912363	0.399778	0.892066	0.972908	0.77736	0.386112
Candidatus.Entotheonella	0.568165	0.0599291	0.882971	0.0751161	-0.258463	0.0532088	0.239457	0.910214	0.0197422	0.887538	0.620938	0.920262	0.912363	0.974228	0.420403	0.966894	0.972689	0.979657
Hyphomicrobium	-0.0345977	-0.0284706	-0.82913	-0.533058	0.337213	-0.0265135	0.948124	0.957306	0.0413003	0.276147	0.513354	0.960239	0.971198	0.996973	0.420403	0.673575	0.933453	0.995323
OM27.clade	0.409947	-0.245671	0.217788	-0.240064	-0.428778	-0.243274	0.419527	0.638907	0.678483	0.646822	0.396248	0.642287	0.912363	0.884399	0.879529	0.848559	0.838396	0.881994
Anaeromyxobacter	0.072888	-0.426743	0.86236	0.712835	-0.756521	-0.430074	0.890862	0.398743	0.0271134	0.111855	0.0817064	0.394663	0.949938	0.824604	0.420403	0.647379	0.340811	0.819374
OM60.NOR5..clade	-0.342451	0.788782	0.162538	0.157526	0.520537	0.788992	0.506403	0.062208	0.75834	0.765665	0.289716	0.0620893	0.912363	0.293901	0.893265	0.902043	0.766143	0.29334
IMCC26207	0.0998399	0.501438	-0.768151	-0.867112	0.667194	0.504778	0.850738	0.310884	0.0743994	0.0253156	0.147709	0.307142	0.949938	0.731344	0.420403	0.647379	0.522056	0.738979
Hymenobacter	-0.255565	0.804324	-0.751826	-0.61503	0.941347	0.808766	0.624998	0.0536877	0.0847427	0.193776	0.00505933	0.0513591	0.918648	0.276193	0.420403	0.647379	0.0320886	0.264214
Shinella	-0.518443	0.661971	-0.653064	-0.273328	0.858903	0.67001	0.29201	0.152083	0.159667	0.600218	0.0284579	0.145373	0.912363	0.563317	0.53909	0.817355	0.147874	0.538463
Nibribacter	-0.32699	0.710955	-0.758834	-0.497139	0.95806	0.714988	0.526996	0.113246	0.0802283	0.315725	0.00260161	0.110272	0.912363	0.452007	0.420403	0.710513	0.0188211	0.440138
Woeseia	-0.297152	0.94285	-0.204937	-0.185766	0.856756	0.942754	0.567391	0.0048058	0.696897	0.724557	0.0293088	0.00482186	0.912363	0.258814	0.879529	0.880498	0.14912	0.249369
Lysinibacillus	0.00114632	-0.239088	0.217166	0.215974	0.119062	-0.236888	0.998281	0.648202	0.679372	0.681077	0.822251	0.651315	0.999646	0.884399	0.879529	0.860355	0.972689	0.881994
Pseudolabrys	-0.0853258	0.679185	-0.102467	-0.269836	0.835351	0.681506	0.872322	0.137874	0.846837	0.60507	0.0384323	0.136004	0.949938	0.523243	0.933537	0.817586	0.191335	0.520411
Methylibium	0.156292	-0.0626322	-0.192095	-0.415854	0.295849	-0.0531085	0.767471	0.906175	0.715401	0.412177	0.569174	0.920412	0.940853	0.974228	0.885644	0.746086	0.960351	0.979657
Edaphobaculum	0.0193565	0.762654	-0.284661	-0.58202	0.865111	0.767581	0.970969	0.0778143	0.584542	0.225549	0.0260653	0.0747504	0.985333	0.343124	0.851573	0.647379	0.140328	0.338376
Piscinibacter	0.217395	0.683933	0.233163	-0.353727	0.427043	0.684594	0.679045	0.13406	0.656593	0.49154	0.398374	0.133533	0.92615	0.518724	0.879529	0.804455	0.838396	0.519545
Galbitalea	-0.0451017	0.478253	-0.820768	-0.778497	0.717451	0.484038	0.932393	0.337315	0.0453074	0.0681616	0.108472	0.330646	0.971198	0.76769	0.420403	0.647379	0.42204	0.750599
Lelliottia	-0.132604	-0.236722	0.694488	0.667235	-0.267354	-0.234705	0.802259	0.65155	0.125748	0.147675	0.608524	0.654407	0.940853	0.884399	0.465771	0.647379	0.972689	0.881994
Bauldia	0.105568	0.471739	-0.0147936	-0.31375	0.092153	0.471515	0.842237	0.344881	0.977811	0.544818	0.862162	0.345143	0.94678	0.771814	0.995004	0.816773	0.972689	0.7711
FFCH5858	-0.393922	-0.258505	0.00409193	0.379355	-0.33677	-0.250435	0.43968	0.62088	0.993862	0.458264	0.513942	0.632201	0.912363	0.884399	0.997812	0.775443	0.933453	0.881994
Kocuria	0.084075	0.0647849	0.801287	0.500016	-0.398588	0.0594658	0.874185	0.902959	0.055307	0.312482	0.433781	0.910906	0.949938	0.974228	0.420403	0.710513	0.866548	0.978833
Sporocytophaga	-0.378203	0.493042	-0.251416	-0.111345	0.601345	0.502463	0.459744	0.320364	0.630822	0.833673	0.20671	0.309734	0.912363	0.74537	0.879529	0.931816	0.651067	0.739211
Aurantisolimonas	-0.14481	0.844982	-0.262519	-0.414583	0.900559	0.849185	0.784304	0.0341832	0.615268	0.413754	0.0143411	0.0324025	0.940853	0.258814	0.877861	0.746086	0.0819067	0.249369
Nostoc.PCC.73102	-0.491075	-0.502198	-0.162738	0.529339	-0.579302	-0.498187	0.3226	0.310031	0.758048	0.280152	0.228251	0.314542	0.912363	0.731344	0.893265	0.675575	0.683605	0.739852
Aquicella	-0.244507	0.601821	-0.722053	-0.562996	0.902742	0.60869	0.640549	0.206255	0.105145	0.24473	0.0137286	0.199726	0.92615	0.677277	0.420403	0.662633	0.0815369	0.655837
Aminobacter	0.357742	0.00201792	-0.0285439	-0.2557	0.130794	-0.00618756	0.486278	0.996973	0.957196	0.624809	0.804927	0.990719	0.912363	0.996973	0.981616	0.829073	0.972689	0.99877
Oryzihumus	-0.153122	0.598945	-0.419297	-0.418246	0.902372	0.603757	0.772113	0.209013	0.407913	0.409213	0.0138316	0.204406	0.940853	0.681391	0.818461	0.746086	0.0815369	0.66648
Brevundimonas	-0.390693	0.824377	-0.596238	-0.391025	0.964601	0.829844	0.443779	0.043557	0.211624	0.443356	0.00185747	0.0409662	0.912363	0.258814	0.583411	0.756679	0.0136509	0.249369
Mucilaginibacter	-0.50546	0.563501	0.243431	0.44708	0.238592	0.56497	0.30638	0.244214	0.642067	0.374061	0.648903	0.242712	0.912363	0.724319	0.879529	0.724138	0.972689	0.716245
Candidatus.Alysiosphaera	0.3359	-0.458685	0.665577	0.390182	-0.824143	-0.466717	0.5151	0.360224	0.149057	0.444428	0.0436692	0.350755	0.912363	0.790445	0.516234	0.756679	0.210613	0.7711
Salinispora	0.285195	0.518342	-0.405044	-0.672351	0.548867	0.51234	0.583805	0.29212	0.42566	0.143444	0.259374	0.298732	0.912363	0.731344	0.828069	0.647379	0.728837	0.738979
Flaviaesturariibacter	0.4261	-0.565461	0.906161	0.399113	-0.764256	-0.567097	0.399532	0.24221	0.0127955	0.433118	0.0768118	0.240543	0.912363	0.723505	0.420403	0.756679	0.332373	0.716245
Neochlamydia	0.295812	-0.208964	-0.251767	-0.276278	-0.112856	-0.21638	0.569224	0.691116	0.630329	0.596127	0.831435	0.680495	0.912363	0.884399	0.879529	0.816773	0.972689	0.881994
Clostridium.sensu.stricto.1	-0.535204	-0.501177	-0.203034	0.611139	-0.265913	-0.500121	0.273847	0.311177	0.699634	0.197418	0.610531	0.312364	0.912363	0.731344	0.879529	0.647379	0.972689	0.739852
possible.genus.04	-0.691481	-0.17913	-0.327455	0.523682	0.117893	-0.175185	0.128093	0.734178	0.526373	0.286286	0.82398	0.739911	0.912363	0.908908	0.839461	0.686789	0.972689	0.913544
Geothermomicrobium	-0.299921	-0.24359	-0.293005	0.133001	0.235222	-0.23771	0.563608	0.641842	0.57307	0.801675	0.653674	0.650151	0.912363	0.884399	0.843144	0.917367	0.972689	0.881994
Parafilimonas	0.419903	0.261891	-0.14864	-0.740437	0.471719	0.268155	0.407164	0.616145	0.778682	0.0923155	0.344905	0.607409	0.912363	0.884399	0.899346	0.647379	0.835398	0.881994
Rhodopseudomonas	-0.11721	-0.553563	0.172574	0.414278	-0.183549	-0.550366	0.824991	0.25447	0.743709	0.414134	0.727769	0.257805	0.942268	0.725803	0.892066	0.746086	0.972689	0.731548
Dactylosporangium	-0.83748	-0.0650696	-0.600373	0.440574	0.159034	-0.0607957	0.0374729	0.902533	0.207642	0.381898	0.763461	0.908919	0.912363	0.974228	0.583411	0.724138	0.972689	0.978833
Candidatus.Nitrososphaera	0.417914	-0.949593	0.311088	0.172323	-0.742689	-0.95155	0.409624	0.00374726	0.548421	0.744074	0.0907955	0.0034642	0.912363	0.258814	0.839461	0.890197	0.368757	0.249369
Rhodococcus	0.0520404	-0.0738994	0.887527	0.630038	-0.368994	-0.0778745	0.92201	0.889353	0.0182638	0.179989	0.47163	0.883424	0.968006	0.974228	0.420403	0.647379	0.902333	0.978833
Sporacetigenium	-0.017965	0.270963	-0.151495	-0.119272	0.519151	0.267552	0.973055	0.603503	0.774496	0.821941	0.291234	0.608249	0.985333	0.884399	0.899346	0.925933	0.766143	0.881994
Lautropia	0.409096	-0.383024	0.873802	0.28975	-0.51934	-0.382348	0.420589	0.453561	0.022884	0.577537	0.291027	0.454425	0.912363	0.824604	0.420403	0.816773	0.766143	0.819374
Citrifermentans	-0.0254357	-0.839802	-0.216875	0.163842	-0.551376	-0.83696	0.961855	0.0364393	0.679787	0.756437	0.25675	0.037706	0.983088	0.258814	0.879529	0.899959	0.728837	0.249369
Actinocorallia	0.000236148	0.138858	-0.283949	-0.295858	-0.0976875	0.141226	0.999646	0.793052	0.585524	0.569162	0.853935	0.78957	0.999646	0.934721	0.851573	0.816773	0.972689	0.939705
Alicyclobacillus	-0.0647378	0.407653	0.24563	0.162726	0.413327	0.402742	0.903029	0.422392	0.638966	0.758065	0.415316	0.428549	0.954572	0.824604	0.879529	0.899959	0.862292	0.819374
Luteitalea	0.199053	0.538183	0.0412781	-0.355461	0.125633	0.535223	0.705364	0.270666	0.938118	0.489266	0.812542	0.273826	0.927795	0.731344	0.979233	0.804455	0.972689	0.738979
Variovorax	-0.597717	0.0195653	-0.829133	-0.0180451	0.400096	0.0252821	0.210196	0.970656	0.0412992	0.972935	0.431879	0.962085	0.912363	0.996973	0.420403	0.986781	0.866548	0.995323
Phenylobacterium	0.308347	0.00351581	0.525009	0.198918	-0.166072	-0.0070571	0.552139	0.994726	0.284841	0.705558	0.753182	0.989415	0.912363	0.996973	0.69056	0.871736	0.972689	0.99877
Romboutsia	-0.340134	-0.0672396	0.601664	0.740749	-0.275848	-0.0645815	0.509475	0.899293	0.206405	0.0921045	0.596722	0.903262	0.912363	0.974228	0.583411	0.647379	0.972689	0.978833
Paraclostridium	0.516125	0.324515	0.0492452	-0.638671	0.585385	0.32536	0.294557	0.530314	0.926192	0.172251	0.222222	0.529181	0.912363	0.876913	0.972396	0.647379	0.683605	0.881335
Geobacter	-0.0381757	-0.766204	0.224353	0.407401	-0.772807	-0.761623	0.942764	0.0756015	0.669117	0.422708	0.0715616	0.0784625	0.971198	0.336572	0.879529	0.752745	0.315553	0.345982
Promicromonospora	0.690377	-0.385257	0.507457	-0.209027	-0.117813	-0.38634	0.128959	0.450705	0.304153	0.691026	0.824098	0.449322	0.912363	0.824604	0.718484	0.864717	0.972689	0.819374
Caenimonas	-0.227764	0.884668	-0.54303	-0.540939	0.877747	0.889208	0.664262	0.0191851	0.26552	0.267735	0.021505	0.0177322	0.92615	0.258814	0.664518	0.673575	0.117139	0.249369
Ellin516	-0.0940167	-0.491278	0.745738	0.787327	-0.533653	-0.49104	0.85939	0.322369	0.088755	0.0630351	0.275509	0.32264	0.949938	0.746284	0.420403	0.647379	0.75825	0.746912
Tumebacillus	0.729612	0.419109	0.165714	-0.794826	0.358883	0.417544	0.0997804	0.408146	0.753704	0.0588261	0.484787	0.410082	0.912363	0.824604	0.893265	0.647379	0.912425	0.819374
Belnapia	0.465991	0.324603	0.204905	-0.309397	0.0855217	0.313964	0.351608	0.530197	0.696944	0.550713	0.87203	0.544528	0.912363	0.876913	0.879529	0.816773	0.972689	0.881994
Luedemannella	-0.754262	0.398793	-0.0313945	0.606006	0.0312403	0.39896	0.0831613	0.433521	0.952924	0.202267	0.953155	0.433311	0.912363	0.824604	0.981616	0.647379	0.988711	0.819374
Streptosporangium	0.122732	0.771178	-0.332339	-0.584926	0.531571	0.766729	0.816827	0.0725485	0.519844	0.222673	0.277746	0.075276	0.940853	0.329313	0.839461	0.647379	0.75825	0.338376
Sandaracinus	-0.0538801	-0.430886	-0.332726	-0.140884	-0.246095	-0.422301	0.919258	0.39367	0.519329	0.790073	0.638309	0.404205	0.96731	0.824604	0.839461	0.916801	0.972689	0.819374
Caulobacter	-0.273861	0.812985	-0.714639	-0.576313	0.966592	0.817626	0.599478	0.0491915	0.110528	0.231238	0.00165553	0.0468576	0.912363	0.258814	0.420403	0.647379	0.0123631	0.249369
Planomicrobium	-0.520485	-0.402793	0.0296682	0.737871	-0.23898	-0.40321	0.289773	0.428486	0.955511	0.094062	0.648355	0.427961	0.912363	0.824604	0.981616	0.647379	0.972689	0.819374
Afifella	0.128287	0.590302	0.162461	-0.306405	0.330598	0.593017	0.808624	0.217394	0.758452	0.554776	0.522169	0.214747	0.940853	0.688742	0.893265	0.816773	0.933453	0.675645
Laceyella	0.171259	0.0608992	0.778754	0.318592	-0.0460715	0.0610063	0.745623	0.908764	0.0680097	0.538281	0.930942	0.908604	0.940663	0.974228	0.420403	0.816773	0.978135	0.978833
Aeromicrobium	-0.425828	-0.334326	0.535005	0.888454	-0.473	-0.331535	0.399865	0.517195	0.27406	0.0179698	0.343412	0.520918	0.912363	0.87319	0.678554	0.647379	0.835398	0.877037
Actinoplanes	-0.275418	0.504705	-0.114348	0.13675	0.393386	0.497533	0.597319	0.307223	0.829225	0.796154	0.44036	0.31528	0.912363	0.731344	0.925135	0.917367	0.866548	0.739852
Bdellovibrio	-0.127151	0.534961	0.224841	0.0415948	0.583107	0.537609	0.810301	0.274107	0.668421	0.937644	0.224472	0.271278	0.940853	0.731344	0.879529	0.972908	0.683605	0.738979
Solibacillus	-0.51194	-0.538829	-0.229957	0.552757	-0.234365	-0.535813	0.299176	0.269978	0.661144	0.255309	0.654889	0.273196	0.912363	0.731344	0.879529	0.673575	0.972689	0.738979
Niastella	0.07347	-0.505027	0.8686	0.710645	-0.707987	-0.505904	0.889993	0.306863	0.0247647	0.113476	0.115457	0.305884	0.949938	0.731344	0.420403	0.647379	0.441791	0.738979
Lechevalieria	-0.410595	-0.616637	-0.00626614	0.633738	-0.331858	-0.614062	0.418718	0.19228	0.990601	0.176655	0.520487	0.19468	0.912363	0.645112	0.997812	0.647379	0.933453	0.650558
Phyllobacterium	-0.666722	0.560715	-0.90222	-0.212133	0.769193	0.566678	0.148102	0.247073	0.0138739	0.686574	0.0737601	0.24097	0.912363	0.724319	0.420403	0.863814	0.322179	0.716245
Pantoea	0.192074	-0.801722	0.266307	0.196541	-0.678943	-0.796247	0.715432	0.0550735	0.609983	0.708984	0.13807	0.0580432	0.938372	0.277163	0.874372	0.871736	0.499424	0.28115
Ahniella	-0.36979	0.917295	-0.616853	-0.42644	0.820998	0.919997	0.470599	0.00997737	0.192079	0.399115	0.0451948	0.0093446	0.912363	0.258814	0.583411	0.736216	0.213522	0.249369
Defluviicoccus	-0.588241	0.199	-0.488224	0.134276	-0.00686402	0.20327	0.219412	0.705441	0.325851	0.799796	0.989704	0.699294	0.912363	0.887754	0.750319	0.917367	0.999138	0.881994
Nonomuraea	0.480761	0.24811	0.39183	-0.165293	-0.0580229	0.237084	0.334417	0.635472	0.442334	0.754318	0.913063	0.651037	0.912363	0.884399	0.837221	0.899959	0.978135	0.881994
Peredibacter	-0.218935	-0.00281861	0.443824	0.501264	0.108546	-0.000559124	0.676845	0.995772	0.377976	0.311079	0.837821	0.999161	0.92615	0.996973	0.785051	0.710513	0.972689	0.999161
Rufibacter	0.617401	-0.355086	0.867577	0.0797252	-0.39092	-0.355654	0.19157	0.489757	0.0251426	0.880666	0.44349	0.489013	0.912363	0.84611	0.420403	0.963573	0.866548	0.844201
Lacunisphaera	0.474474	0.0486275	0.419392	-0.228945	0.27523	0.0488354	0.341697	0.927116	0.407795	0.662583	0.597579	0.926805	0.912363	0.980359	0.818461	0.850124	0.972689	0.979705
Actinomycetospora	-0.142197	0.641745	-0.411052	-0.274908	0.61407	0.635803	0.788143	0.16953	0.418148	0.598026	0.194672	0.174805	0.940853	0.61322	0.82384	0.816773	0.631464	0.615192
Paeniclostridium	-0.0369261	-0.221164	0.684996	0.519187	-0.384655	-0.217428	0.944636	0.673662	0.133212	0.291194	0.451474	0.678997	0.971198	0.884399	0.483917	0.694964	0.878287	0.881994
Cryobacterium	0.356467	-0.0809252	-0.230514	-0.621621	0.264601	-0.0729345	0.487947	0.878877	0.660353	0.18767	0.612362	0.890792	0.912363	0.974228	0.879529	0.647379	0.972689	0.978833
Candidatus.Ovatusbacter	-0.794851	0.318106	-0.846367	0.0173394	0.511796	0.3262	0.0588122	0.538936	0.0335914	0.973993	0.299334	0.528054	0.912363	0.884399	0.420403	0.986781	0.77736	0.881335
Oxalicibacterium	0.558202	0.151804	-0.30361	-0.796202	0.0917688	0.148169	0.249662	0.774043	0.558579	0.0580683	0.862733	0.779374	0.912363	0.934005	0.839461	0.647379	0.972689	0.934845
Chitinophaga	0.501871	0.327093	0.524979	-0.158398	-0.0724842	0.317694	0.310398	0.526858	0.284875	0.76439	0.891464	0.539492	0.912363	0.876913	0.69056	0.902043	0.978076	0.881994
AKYG587	-0.092704	0.061806	0.241376	0.333017	-0.429915	0.0548919	0.861342	0.907409	0.644968	0.51894	0.394857	0.917745	0.949938	0.974228	0.879529	0.814472	0.838396	0.979657
Conexibacter	0.331189	0.276447	0.117926	-0.224312	-0.0811663	0.2665	0.521379	0.595894	0.823931	0.669175	0.878518	0.609714	0.912363	0.884399	0.925135	0.85352	0.972689	0.881994
Sorangium	-0.569953	-0.560614	0.0518699	0.752452	-0.517274	-0.554595	0.237644	0.247176	0.922265	0.0843354	0.293293	0.253397	0.912363	0.724319	0.970474	0.647379	0.7672	0.731548
Sumerlaea	0.719853	-0.0412646	0.847961	-0.0484242	-0.292068	-0.0491367	0.10673	0.938138	0.0329164	0.927421	0.574355	0.926354	0.912363	0.987177	0.420403	0.972908	0.960351	0.979705
JTB255.marine.benthic.group	-0.453537	0.587701	-0.877767	-0.45297	0.814426	0.595012	0.36634	0.219942	0.0214981	0.367016	0.0484611	0.212811	0.912363	0.688742	0.420403	0.721009	0.226641	0.675645
Novosphingobium	-0.15371	0.651245	-0.182098	-0.308256	0.801931	0.657573	0.771251	0.161235	0.729872	0.552261	0.0549617	0.155809	0.940853	0.592476	0.886958	0.816773	0.251953	0.572535
Dechloromonas	-0.223629	-0.630466	-0.279151	0.32507	-0.510489	-0.632457	0.670149	0.179603	0.592151	0.529571	0.300783	0.177807	0.92615	0.621623	0.854099	0.816773	0.77736	0.615192
Noviherbaspirillum	0.319438	0.26936	0.792194	0.142215	0.0134867	0.266064	0.53714	0.605732	0.060288	0.788116	0.979771	0.610321	0.912363	0.884399	0.420403	0.916801	0.999138	0.881994
Vulgatibacter	0.877941	0.109266	0.154789	-0.759781	0.0655678	0.102872	0.0214384	0.836753	0.769671	0.0796266	0.901789	0.846236	0.912363	0.956585	0.899346	0.647379	0.978135	0.962671
Stenotrophomonas	-0.206679	-0.07416	0.643403	0.621774	-0.226418	-0.0708281	0.694395	0.888964	0.168069	0.187529	0.666176	0.893935	0.92615	0.974228	0.548001	0.647379	0.972689	0.978833
Turicibacter	-0.494641	-0.416928	0.398816	0.927138	-0.405477	-0.415367	0.31855	0.410845	0.433492	0.00776988	0.425117	0.412781	0.912363	0.824604	0.837221	0.647379	0.866548	0.819374
Gemmata	0.0168731	0.064446	-0.572503	-0.345247	0.060538	0.0592816	0.974693	0.903465	0.235068	0.502705	0.909304	0.911182	0.985333	0.974228	0.61587	0.809622	0.978135	0.978833
Nocardia	-0.151618	-0.404796	-0.514534	-0.147412	0.0938534	-0.396812	0.774315	0.425971	0.296309	0.780483	0.859633	0.436023	0.940853	0.824604	0.708418	0.910236	0.972689	0.819374
Pontibacillus	-0.211104	-0.0322618	0.459084	0.598311	-7.233e-05	-0.0352141	0.688048	0.951624	0.359752	0.209624	0.999892	0.947201	0.92615	0.994587	0.777283	0.647379	0.999892	0.992203
Cellvibrio	-0.607345	-0.538613	-0.297297	0.616268	-0.449824	-0.536659	0.200998	0.270207	0.567193	0.192623	0.370774	0.272291	0.912363	0.731344	0.839461	0.647379	0.838396	0.738979
P3OB.42	-0.183374	0.051934	-0.444476	-0.0197586	0.104852	0.0456044	0.728021	0.922169	0.377191	0.970366	0.843298	0.931641	0.940663	0.979942	0.785051	0.986781	0.972689	0.982573
Kaistia	0.734015	-0.427355	0.454758	-0.228879	-0.181008	-0.431249	0.0967128	0.397991	0.364886	0.662677	0.731453	0.393227	0.912363	0.824604	0.778537	0.850124	0.972689	0.819374
IS.44	-0.0699064	0.082079	0.718496	0.597572	-0.394717	0.0768713	0.895311	0.877158	0.107713	0.210336	0.438674	0.88492	0.949938	0.974228	0.420403	0.647379	0.866548	0.978833
Marimicrobium	0.544343	0.467084	0.0275473	-0.711755	0.639166	0.466161	0.264133	0.350325	0.95869	0.112653	0.171811	0.351409	0.912363	0.772384	0.981616	0.647379	0.589249	0.7711
Polaromonas	-0.132377	0.234805	0.280306	0.124822	0.0674003	0.24133	0.802595	0.654266	0.590553	0.81374	0.899053	0.645032	0.940853	0.884399	0.854099	0.921774	0.978135	0.881994
Cytophaga	0.295452	-0.0344406	0.139084	-0.181983	-0.401472	-0.0367531	0.569718	0.94836	0.79272	0.730039	0.430147	0.944895	0.912363	0.993417	0.907803	0.882576	0.866548	0.992033
Roseomonas	-0.206558	-0.0387075	0.487381	0.46147	-0.177795	-0.0329113	0.69457	0.941968	0.326815	0.356931	0.736118	0.950651	0.92615	0.988959	0.750319	0.713689	0.972689	0.99357
Glycomyces	0.487519	-0.824569	0.205825	-0.0308088	-0.48736	-0.825567	0.326656	0.0434647	0.695623	0.953801	0.326839	0.0429867	0.912363	0.258814	0.879529	0.979106	0.817981	0.249369
Parviterribacter	0.668442	-0.372121	-0.0239314	-0.505912	-0.0461341	-0.375808	0.146672	0.467583	0.96411	0.305875	0.930848	0.462826	0.912363	0.826802	0.983222	0.710513	0.978135	0.823559
Acidothermus	0.761927	0.245189	0.288399	-0.570146	0.0303137	0.236689	0.078271	0.639587	0.579396	0.237448	0.954543	0.651596	0.912363	0.884399	0.848925	0.652537	0.988711	0.881994
Flavihumibacter	0.3398	0.015245	-0.249777	-0.654242	0.203926	0.0228656	0.509918	0.977134	0.633126	0.158656	0.698351	0.965708	0.912363	0.996973	0.879529	0.647379	0.972689	0.995323
Kineosporia	-0.107709	-0.073322	0.283081	0.257052	0.192581	-0.0680242	0.839061	0.890214	0.586721	0.622914	0.7147	0.898121	0.94678	0.974228	0.851573	0.829073	0.972689	0.978833
FFCH7168	-0.793326	0.0606783	-0.138157	0.695565	-0.230261	0.0615092	0.0596571	0.909094	0.794083	0.124914	0.660712	0.907853	0.912363	0.974228	0.907803	0.647379	0.972689	0.978833
Aridibacter	-0.0420454	-0.402705	-0.0277329	0.124465	0.0657356	-0.398249	0.936969	0.428596	0.958411	0.814267	0.901539	0.434209	0.971198	0.824604	0.981616	0.921774	0.978135	0.819374
Paludibacterium	-0.273861	0.812985	-0.714639	-0.576313	0.966592	0.817626	0.599478	0.0491915	0.110528	0.231238	0.00165553	0.0468576	0.912363	0.258814	0.420403	0.647379	0.0123631	0.249369
Allocatelliglobosispora	-0.129268	0.79527	0.251235	0.043991	0.52566	0.792241	0.807179	0.0585809	0.631076	0.934056	0.284135	0.0602617	0.940853	0.282659	0.879529	0.972908	0.764851	0.287641
Herpetosiphon	0.21244	-0.965916	0.361961	0.391154	-0.740361	-0.965478	0.686134	0.0017228	0.48077	0.443192	0.0923672	0.00176707	0.92615	0.258814	0.839461	0.756679	0.371878	0.249369
Psychrobacillus	-0.382827	0.0592214	0.463095	0.653663	0.0433941	0.0617761	0.453813	0.911272	0.355015	0.159152	0.93495	0.907454	0.912363	0.974228	0.771699	0.647379	0.978135	0.978833
Myxococcus	-0.537486	0.15491	0.082157	0.503925	0.320157	0.159008	0.271409	0.769493	0.877042	0.308096	0.536172	0.763498	0.912363	0.934005	0.950849	0.710513	0.95114	0.927977
Methylorosula	0.385378	0.268108	0.740716	0.0809575	0.0833306	0.262426	0.450551	0.607474	0.092127	0.878829	0.875293	0.615398	0.912363	0.884399	0.420403	0.963573	0.972689	0.881994
SH3.11	-0.154012	0.155459	-0.472989	-0.378859	0.28655	0.165431	0.770808	0.768689	0.343425	0.458901	0.581939	0.754117	0.940853	0.934005	0.75717	0.775443	0.960351	0.921256
Thermoflavimicrobium	0.481902	0.311219	-0.103444	-0.707252	0.627925	0.31257	0.333103	0.548243	0.845387	0.116007	0.181905	0.546414	0.912363	0.884399	0.933537	0.647379	0.610304	0.881994
Cnuella	-0.342327	0.206056	0.594867	0.675999	-0.0800028	0.206033	0.506568	0.69529	0.212951	0.140458	0.880252	0.695323	0.912363	0.884399	0.583411	0.647379	0.972689	0.881994
OLB12	0.34149	-0.488527	0.784034	0.313136	-0.556214	-0.486047	0.507677	0.325505	0.0649256	0.545648	0.251718	0.328342	0.912363	0.748156	0.420403	0.816773	0.722991	0.750599
Legionella	-0.470325	0.815065	-0.438491	-0.0846339	0.811175	0.813499	0.346532	0.0481392	0.384418	0.873352	0.0501163	0.0489304	0.912363	0.258814	0.791048	0.962767	0.232038	0.257441
Fictibacillus	0.20902	0.0515146	-0.0705639	-0.125425	-0.00763594	0.0416061	0.691036	0.922796	0.89433	0.812849	0.988546	0.937627	0.92615	0.979942	0.953651	0.921774	0.999138	0.986639
Lihuaxuella	-0.159992	-0.206053	-0.261845	-0.00387206	-0.364333	-0.202068	0.76206	0.695294	0.616209	0.994192	0.477681	0.701024	0.940853	0.884399	0.877861	0.99447	0.91015	0.881994
Herbinix	-0.235929	0.57115	0.31691	0.340652	0.269553	0.564812	0.652672	0.236433	0.540549	0.508787	0.605463	0.242874	0.92615	0.715481	0.839461	0.809622	0.972689	0.716245
Vicinamibacter	0.610489	-0.0233996	-0.255057	-0.829352	0.0377963	-0.0220894	0.198031	0.964907	0.625711	0.0411965	0.943333	0.966871	0.912363	0.996973	0.879529	0.647379	0.9837	0.995323
Pir4.lineage	-0.666673	0.25154	0.165633	0.639413	-0.0200965	0.255773	0.148143	0.630648	0.753823	0.171592	0.969859	0.624706	0.912363	0.884399	0.893265	0.647379	0.999138	0.881994
Terrisporobacter	-0.479257	-0.378394	-0.307414	0.470396	-0.158694	-0.379535	0.336154	0.459499	0.553404	0.346449	0.763957	0.458033	0.912363	0.824604	0.839461	0.710513	0.972689	0.819374
Candidatus.Berkiella	-0.327125	0.845163	-0.778825	-0.531458	0.861043	0.846794	0.526816	0.0341058	0.0679676	0.277868	0.0276221	0.0334099	0.912363	0.258814	0.420403	0.673575	0.147001	0.249369
TM7a	0.125832	-0.782138	0.376111	0.440356	-0.955701	-0.783799	0.812248	0.0660255	0.462436	0.382161	0.0029002	0.0650611	0.940853	0.308786	0.839461	0.724138	0.0197469	0.301233
Labrys	-0.442723	0.0873496	0.147157	0.602421	0.0983311	0.0833468	0.379304	0.869309	0.780857	0.205681	0.852979	0.875269	0.912363	0.974228	0.899346	0.647379	0.972689	0.978833
Acinetobacter	0.616188	-0.513267	0.331369	-0.277253	-0.182302	-0.509661	0.192698	0.297708	0.52114	0.594776	0.729577	0.301702	0.912363	0.731344	0.839461	0.816773	0.972689	0.738979
Pseudenhygromyxa	0.172802	0.123198	0.527656	0.275922	-0.344556	0.113208	0.743376	0.816138	0.281971	0.59662	0.503619	0.830913	0.940663	0.945287	0.69056	0.816773	0.928986	0.954622
Cylindrospermum.PCC.7417	0.0747994	0.0763941	0.339739	0.292441	-0.162116	0.0656331	0.88801	0.885632	0.509999	0.573844	0.758957	0.901692	0.949938	0.974228	0.839461	0.816773	0.972689	0.978833
Phreatobacter	-0.204578	-0.17912	0.629698	0.648033	-0.240955	-0.175427	0.697415	0.734194	0.180297	0.16402	0.645562	0.739558	0.92615	0.908908	0.571763	0.647379	0.972689	0.913544
Dokdonella	0.175204	0.513959	-0.388794	-0.748078	0.720083	0.520652	0.739882	0.296943	0.446194	0.0872031	0.106564	0.289591	0.940663	0.731344	0.837817	0.647379	0.418129	0.738979
Pirellula	-0.603742	-0.256142	-0.300109	0.500883	0.0546959	-0.253483	0.204421	0.624189	0.563351	0.311507	0.918038	0.627919	0.912363	0.884399	0.839461	0.710513	0.978135	0.881994
Bosea	0.130356	-0.088002	-0.487788	-0.572171	0.290276	-0.0788798	0.805574	0.868338	0.326349	0.235402	0.576815	0.881926	0.940853	0.974228	0.750319	0.652537	0.960351	0.978833
Coxiella	-0.335275	0.468324	-0.718875	-0.399016	0.394853	0.473328	0.515932	0.348872	0.107438	0.433241	0.438501	0.34303	0.912363	0.772384	0.420403	0.756679	0.866548	0.7711
Verrucomicrobium	0.0767974	0.792405	-0.505698	-0.778297	0.899978	0.79579	0.88503	0.0601701	0.306114	0.0682798	0.0145061	0.0582946	0.949938	0.287204	0.719445	0.647379	0.0819067	0.28115
Methylobacterium.Methylorubrum	0.357926	-0.754498	0.368673	0.147859	-0.403084	-0.752924	0.486038	0.0830087	0.472045	0.779828	0.428119	0.0840285	0.912363	0.360422	0.839461	0.910236	0.866548	0.360233
Domibacillus	-0.295073	-0.317692	0.160484	0.62094	-0.218669	-0.322158	0.570236	0.539494	0.761341	0.188297	0.677224	0.533481	0.912363	0.884399	0.893265	0.647379	0.972689	0.881994
Blastopirellula	-0.257624	0.585968	0.435245	0.355104	0.251399	0.584523	0.622113	0.221647	0.388359	0.489733	0.630846	0.223071	0.91732	0.688742	0.792115	0.804455	0.972689	0.688478
Candidatus.Accumulibacter	-0.686781	0.129377	-0.413058	0.444082	0.153954	0.126588	0.131795	0.807017	0.415651	0.377666	0.770893	0.811133	0.912363	0.938817	0.82242	0.724138	0.972689	0.941239
Clostridium.sensu.stricto.5	0.504315	0.407099	0.0934514	-0.475269	0.17112	0.397557	0.30766	0.423086	0.860231	0.340774	0.745825	0.435081	0.912363	0.824604	0.943808	0.710513	0.972689	0.819374
Micromonospora	0.5203	-0.394212	0.292597	-0.263035	-0.0427706	-0.389623	0.289976	0.439313	0.573629	0.614547	0.935883	0.445139	0.912363	0.824604	0.843144	0.824739	0.978135	0.819374
Demequina	-0.328564	0.542129	-0.415309	-0.2886	0.544443	0.550959	0.524889	0.266474	0.412853	0.579119	0.264027	0.257185	0.912363	0.731344	0.821692	0.816773	0.732002	0.731548
Microbacterium	-0.318935	-0.0752428	-0.0709369	0.233503	-0.342692	-0.0708986	0.537819	0.887349	0.893773	0.656111	0.506085	0.89383	0.912363	0.974228	0.953651	0.850124	0.92983	0.978833
KD3.10	0.227697	-0.447583	0.365148	0.122667	-0.651637	-0.444824	0.664358	0.373458	0.476621	0.816922	0.160897	0.376772	0.92615	0.806895	0.839461	0.922524	0.560116	0.811375
ADurb.Bin118	0.116348	-0.224295	0.484084	0.454538	-0.441162	-0.234615	0.826265	0.669199	0.330594	0.365148	0.381188	0.654534	0.942268	0.884399	0.750319	0.721009	0.838396	0.881994
Verruc.01	-0.393408	-0.498591	-0.573915	0.108947	-0.149039	-0.49131	0.440332	0.314087	0.233645	0.837226	0.778096	0.322332	0.912363	0.734456	0.61587	0.931816	0.972689	0.746912
Paracoccus	-0.424888	0.150187	0.557838	0.763684	-0.106689	0.149983	0.401021	0.776413	0.250038	0.0771694	0.840574	0.776713	0.912363	0.934005	0.646745	0.647379	0.972689	0.934072
Qipengyuania	0.459535	0.544823	-0.0702319	-0.61425	0.379734	0.536822	0.359218	0.263626	0.894825	0.194504	0.457777	0.272117	0.912363	0.731344	0.953651	0.647379	0.883129	0.738979
Sphingorhabdus	-0.188407	0.639432	0.192728	0.148366	0.146197	0.634492	0.720734	0.171576	0.714488	0.779084	0.782267	0.175979	0.940663	0.61581	0.885644	0.910236	0.972689	0.615192
Thermoactinomyces	0.244628	0.00347594	0.0279153	-0.0931846	0.0928394	-0.00513444	0.640378	0.994786	0.958138	0.860628	0.861141	0.992298	0.92615	0.996973	0.981616	0.953279	0.972689	0.99877
Chryseobacterium	-0.384269	0.170342	0.579084	0.723989	-0.0919908	0.170334	0.451968	0.746958	0.228468	0.10376	0.862403	0.74697	0.912363	0.919791	0.611449	0.647379	0.972689	0.917631
Cellulosimicrobium	0.305805	-0.342855	0.744805	0.293006	-0.242383	-0.341388	0.555592	0.505869	0.0893772	0.573069	0.643545	0.507812	0.912363	0.860932	0.420403	0.816773	0.972689	0.8644
Taibaiella	-0.207882	-0.453252	0.548398	0.683522	-0.572726	-0.448691	0.692669	0.366679	0.259865	0.134389	0.234842	0.37213	0.92615	0.800813	0.658515	0.647379	0.69411	0.808902
Roseisolibacter	0.0955098	-0.116739	0.040657	0.133978	-0.212596	-0.126728	0.857171	0.825687	0.939048	0.800236	0.685911	0.810925	0.949938	0.948618	0.979233	0.917367	0.972689	0.941239
Fluviicola	0.431023	-0.898583	0.600615	0.285153	-0.749477	-0.897659	0.393503	0.0149067	0.20741	0.583864	0.0862807	0.0151746	0.912363	0.258814	0.583411	0.816773	0.353522	0.249369
Candidatus.Koribacter	-0.086991	0.635872	-0.327041	-0.472672	0.855488	0.642449	0.869843	0.174744	0.526929	0.343794	0.0298165	0.168909	0.949938	0.618384	0.839461	0.710513	0.150055	0.610977
Oceanicella	0.132789	-0.471581	0.455649	0.298623	-0.180784	-0.467842	0.801987	0.345066	0.363827	0.56538	0.731778	0.349437	0.940853	0.771814	0.778537	0.816773	0.972689	0.7711
Shimazuella	0.241024	0.0142374	-0.185152	-0.283108	-0.239173	0.00742326	0.645465	0.978645	0.725445	0.586683	0.648081	0.988865	0.92615	0.996973	0.886958	0.816773	0.972689	0.99877
Tabrizicola	-0.213134	0.555658	-0.834693	-0.631394	0.615855	0.560485	0.685139	0.252294	0.0387309	0.178764	0.193007	0.247309	0.92615	0.725803	0.420403	0.647379	0.631464	0.724709
Ideonella	-0.184321	-0.0657344	0.768334	0.787757	-0.395829	-0.0693136	0.72665	0.90154	0.0742871	0.0627902	0.437266	0.896196	0.940663	0.974228	0.420403	0.647379	0.866548	0.978833
Mycetocola	-0.672023	-0.200038	-0.131022	0.713327	-0.0857423	-0.200675	0.143713	0.703945	0.804591	0.111492	0.871702	0.703028	0.912363	0.887754	0.913053	0.647379	0.972689	0.88212
Anaerolinea	0.812202	-0.333247	0.406298	-0.470789	-0.106408	-0.331781	0.0495905	0.518633	0.424088	0.34599	0.84099	0.520589	0.912363	0.87319	0.828069	0.710513	0.972689	0.877037
Conyzicola	-0.273861	0.812985	-0.714639	-0.576313	0.966592	0.817626	0.599478	0.0491915	0.110528	0.231238	0.00165553	0.0468576	0.912363	0.258814	0.420403	0.647379	0.0123631	0.249369
Cystobacter	-0.354281	0.0818048	-0.759092	-0.178876	0.0505653	0.0821139	0.490812	0.877567	0.080064	0.734548	0.924217	0.877106	0.912363	0.974228	0.420403	0.882576	0.978135	0.978833
Polyangium	-0.521268	0.3915	0.237753	0.492064	0.0755574	0.394983	0.288917	0.442753	0.65009	0.321474	0.88688	0.438337	0.912363	0.824604	0.879529	0.710513	0.975357	0.819374
Rhodocytophaga	-0.728415	0.0664901	0.135244	0.833049	0.0156827	0.0665935	0.100622	0.900412	0.798371	0.039482	0.976478	0.900257	0.912363	0.974228	0.910457	0.647379	0.999138	0.978833
WCHB1.32	-0.511578	-0.303378	-0.381298	0.415741	-0.0508129	-0.303831	0.299576	0.558894	0.455771	0.412317	0.923846	0.558278	0.912363	0.884399	0.839461	0.746086	0.978135	0.881994
Luteimonas	-0.436861	0.132332	0.552683	0.771498	-0.152619	0.132542	0.386396	0.80266	0.255386	0.0723544	0.772849	0.802351	0.912363	0.9361	0.656533	0.647379	0.972689	0.941239
X.Aquaspirillum..arcticum.group	-0.273861	0.812985	-0.714639	-0.576313	0.966592	0.817626	0.599478	0.0491915	0.110528	0.231238	0.00165553	0.0468576	0.912363	0.258814	0.420403	0.647379	0.0123631	0.249369
Cohnella	0.0713176	-0.144586	-0.370402	-0.398958	-0.0507084	-0.136763	0.893205	0.784633	0.469806	0.433314	0.924003	0.796134	0.949938	0.934005	0.839461	0.756679	0.978135	0.940332
Segetibacter	-0.513442	-0.0152396	0.225596	0.612349	-0.299693	-0.0106062	0.297515	0.977142	0.667346	0.196283	0.563919	0.984091	0.912363	0.996973	0.879529	0.647379	0.960351	0.99877
Sporosarcina	-0.204092	0.237724	0.61198	0.545674	0.077683	0.237053	0.698113	0.650131	0.196629	0.262729	0.88371	0.651081	0.92615	0.884399	0.583411	0.673575	0.974185	0.881994
Neorhizobium	0.616188	-0.513267	0.331369	-0.277253	-0.182302	-0.509661	0.192698	0.297708	0.52114	0.594776	0.729577	0.301702	0.912363	0.731344	0.839461	0.816773	0.972689	0.738979
Sphingopyxis	-0.329884	0.477447	-0.746126	-0.448949	0.479707	0.483976	0.523123	0.338248	0.0884966	0.371821	0.335635	0.330717	0.912363	0.76769	0.420403	0.723332	0.83101	0.750599
Alkalibacter	0.174861	0.0579269	0.0263961	-0.285205	0.427494	0.0646306	0.740382	0.913207	0.960415	0.583792	0.397822	0.903189	0.940663	0.974228	0.981616	0.816773	0.838396	0.978833
SH.PL14	-0.597066	-0.27736	-0.65189	0.238254	-0.189354	-0.273807	0.210824	0.594629	0.160679	0.649381	0.719364	0.599553	0.912363	0.884399	0.53909	0.848559	0.972689	0.881994
Dyadobacter	0.0369681	0.548687	0.175615	-0.219798	0.440184	0.553869	0.944573	0.259563	0.739285	0.675612	0.38237	0.254152	0.971198	0.731344	0.892066	0.859364	0.838396	0.731548
Candidatus.Paracaedibacter	-0.425654	-0.722858	0.151363	0.778206	-0.730707	-0.719903	0.40008	0.104568	0.774689	0.0683334	0.0990137	0.106694	0.912363	0.420999	0.899346	0.647379	0.395201	0.429561
Polycladomyces	0.408137	-0.624733	0.122099	-0.199461	-0.476371	-0.619062	0.421787	0.184814	0.817762	0.704776	0.339495	0.190031	0.912363	0.633845	0.925135	0.871736	0.834851	0.646942
Actinophytocola	-0.585596	-0.276017	0.08588	0.725195	-0.530957	-0.273239	0.222013	0.596489	0.871497	0.102901	0.278407	0.600342	0.912363	0.884399	0.950849	0.647379	0.75825	0.881994
Terrimicrobium	-0.273861	0.812985	-0.714639	-0.576313	0.966592	0.817626	0.599478	0.0491915	0.110528	0.231238	0.00165553	0.0468576	0.912363	0.258814	0.420403	0.647379	0.0123631	0.249369
Methylobacillus	0.792595	-0.446554	0.386776	-0.409945	-0.167041	-0.445567	0.060064	0.374692	0.448766	0.419529	0.751768	0.375879	0.912363	0.806895	0.837817	0.749968	0.972689	0.811375
Sphaerisporangium	-0.273861	0.812985	-0.714639	-0.576313	0.966592	0.817626	0.599478	0.0491915	0.110528	0.231238	0.00165553	0.0468576	0.912363	0.258814	0.420403	0.647379	0.0123631	0.249369
Sulfurifustis	0.580058	-0.375117	0.44371	-0.112386	-0.674357	-0.379285	0.227498	0.463717	0.378113	0.83213	0.141799	0.458354	0.912363	0.826802	0.785051	0.931816	0.508937	0.819374
Pseudorhodobacter	-0.273861	0.812985	-0.714639	-0.576313	0.966592	0.817626	0.599478	0.0491915	0.110528	0.231238	0.00165553	0.0468576	0.912363	0.258814	0.420403	0.647379	0.0123631	0.249369
Oikopleura	0.0880965	-0.411385	0.551464	0.390103	-0.198756	-0.407966	0.868197	0.417734	0.256657	0.444529	0.705792	0.422001	0.949938	0.824604	0.656533	0.756679	0.972689	0.819374
Arthrobacter	-0.273861	0.812985	-0.714639	-0.576313	0.966592	0.817626	0.599478	0.0491915	0.110528	0.231238	0.00165553	0.0468576	0.912363	0.258814	0.420403	0.647379	0.0123631	0.249369
Ralstonia	0.080079	-0.01739	0.378804	0.301437	-0.497018	-0.0259243	0.880138	0.973918	0.458971	0.56154	0.315861	0.961122	0.949938	0.996973	0.839461	0.816773	0.799146	0.995323
Arcticibacter	0.616188	0.13862	0.29943	-0.333327	-0.111479	0.127957	0.192698	0.793402	0.564279	0.518527	0.833474	0.809111	0.912363	0.934721	0.839461	0.814472	0.972689	0.941239
YC.ZSS.LKJ147	0.487411	-0.553963	0.116076	-0.318573	-0.309683	-0.54779	0.32678	0.254054	0.826668	0.538306	0.550326	0.260504	0.912363	0.725803	0.925135	0.816773	0.960351	0.731548
Asticcacaulis	-0.273861	0.812985	-0.714639	-0.576313	0.966592	0.817626	0.599478	0.0491915	0.110528	0.231238	0.00165553	0.0468576	0.912363	0.258814	0.420403	0.647379	0.0123631	0.249369
Longimicrobium	0.439611	-0.404004	0.608892	0.0517912	-0.216745	-0.400484	0.383063	0.426965	0.199536	0.922383	0.679973	0.431391	0.912363	0.824604	0.583411	0.972908	0.972689	0.819374
Georgfuchsia	-0.397409	0.893013	-0.510348	-0.342099	0.94672	0.897686	0.435269	0.016557	0.30094	0.50687	0.00418245	0.0151666	0.912363	0.258814	0.714539	0.809622	0.0272743	0.249369
SWB02	-0.273861	0.812985	-0.714639	-0.576313	0.966592	0.817626	0.599478	0.0491915	0.110528	0.231238	0.00165553	0.0468576	0.912363	0.258814	0.420403	0.647379	0.0123631	0.249369
Sediminibacterium	-0.273861	0.812985	-0.714639	-0.576313	0.966592	0.817626	0.599478	0.0491915	0.110528	0.231238	0.00165553	0.0468576	0.912363	0.258814	0.420403	0.647379	0.0123631	0.249369
Nostoc.PCC.7524	-0.80198	0.139003	-0.159983	0.674559	0.202476	0.139883	0.0549356	0.792839	0.762073	0.141634	0.700436	0.791544	0.912363	0.934721	0.893265	0.647379	0.972689	0.939705
Virgisporangium	-0.550367	-0.204077	-0.473713	0.350954	0.0545042	-0.204202	0.257804	0.698134	0.342582	0.495183	0.918325	0.697954	0.912363	0.885578	0.75717	0.804455	0.978135	0.881994
Polycyclovorans	-0.709188	-0.402584	-0.220607	0.683996	-0.449339	-0.398567	0.11456	0.428748	0.674458	0.13401	0.371353	0.433807	0.912363	0.824604	0.879529	0.647379	0.838396	0.819374
Geotalea	-0.448074	-0.244196	-0.486444	0.230838	0.118689	-0.242943	0.372869	0.640987	0.327887	0.659893	0.822803	0.642755	0.912363	0.884399	0.750319	0.850124	0.972689	0.881994
Nannocystis	0.276093	0.12008	0.572133	0.0785561	0.210456	0.118677	0.596384	0.820746	0.235441	0.882408	0.688976	0.82282	0.912363	0.945287	0.61587	0.963573	0.972689	0.949407
Brevibacillus	-0.273861	0.812985	-0.714639	-0.576313	0.966592	0.817626	0.599478	0.0491915	0.110528	0.231238	0.00165553	0.0468576	0.912363	0.258814	0.420403	0.647379	0.0123631	0.249369
Sphingobacterium	-0.252392	0.231804	0.653404	0.636914	-0.0990396	0.230109	0.629451	0.658521	0.159375	0.173814	0.851926	0.660928	0.922266	0.884399	0.53909	0.647379	0.972689	0.881994
Pelosinus	0.427446	-0.539602	0.0572886	-0.307276	-0.33348	-0.533127	0.39788	0.269155	0.914161	0.553593	0.518323	0.276073	0.912363	0.731344	0.966339	0.816773	0.933453	0.738979
Clostridium.sensu.stricto.8	0.32544	-0.367765	0.31212	-0.109524	-0.211593	-0.360345	0.529073	0.473223	0.547023	0.836372	0.687347	0.482878	0.912363	0.826802	0.839461	0.931816	0.972689	0.840498
Jatrophihabitans	0.582389	0.278257	0.185098	-0.437009	0.0490234	0.268163	0.225183	0.593387	0.725524	0.386216	0.926524	0.607397	0.912363	0.884399	0.886958	0.726903	0.978135	0.881994
Candidatus.Glomeribacter	0.275118	0.267028	0.685337	0.206866	-0.152633	0.257958	0.597735	0.608979	0.132941	0.694127	0.772828	0.621646	0.912363	0.884399	0.483917	0.866255	0.972689	0.881994
Bacteroides	-0.273861	0.812985	-0.714639	-0.576313	0.966592	0.817626	0.599478	0.0491915	0.110528	0.231238	0.00165553	0.0468576	0.912363	0.258814	0.420403	0.647379	0.0123631	0.249369
Tahibacter	-0.409956	0.895317	-0.478901	-0.308274	0.935441	0.899951	0.419515	0.0158643	0.336565	0.552238	0.00611723	0.0145139	0.912363	0.258814	0.755854	0.816773	0.038274	0.249369
Rhodomicrobium	-0.273861	0.812985	-0.714639	-0.576313	0.966592	0.817626	0.599478	0.0491915	0.110528	0.231238	0.00165553	0.0468576	0.912363	0.258814	0.420403	0.647379	0.0123631	0.249369
Fimbriiglobus	-0.324775	0.725687	-0.792999	-0.566927	0.821012	0.731637	0.529966	0.102551	0.059839	0.240716	0.0451878	0.0983645	0.912363	0.416499	0.420403	0.655597	0.213522	0.406632
Ammoniphilus	0.475816	0.518768	-0.0425592	-0.598441	0.345628	0.510489	0.340138	0.291653	0.9362	0.209498	0.502202	0.300783	0.912363	0.731344	0.979233	0.647379	0.928986	0.738979
Serratia	0.616188	-0.513267	0.331369	-0.277253	-0.182302	-0.509661	0.192698	0.297708	0.52114	0.594776	0.729577	0.301702	0.912363	0.731344	0.839461	0.816773	0.972689	0.738979
Hirschia	0.0386996	0.299312	-0.587446	-0.687392	0.548521	0.307928	0.94198	0.564439	0.220192	0.131311	0.259737	0.552707	0.971198	0.884399	0.596193	0.647379	0.728837	0.881994
Pedosphaera	0.240079	-0.508133	-0.0595378	-0.148977	-0.00583091	-0.503974	0.646801	0.3034	0.910799	0.778188	0.991254	0.308041	0.92615	0.731344	0.964988	0.910236	0.999138	0.738979
Azotobacter	-0.411171	0.393918	0.445543	0.559579	0.136731	0.394943	0.418	0.439685	0.375907	0.248242	0.796181	0.438387	0.912363	0.824604	0.785051	0.668233	0.972689	0.819374
Pseudoflavitalea	0.800513	0.29582	0.327287	-0.622267	0.222651	0.288792	0.0557232	0.569213	0.526598	0.187075	0.671542	0.578855	0.912363	0.884399	0.839461	0.647379	0.972689	0.881994
Crinalium.SAG.22.89	0.261435	0.197557	0.623238	0.227364	-0.188688	0.18727	0.616781	0.707519	0.186183	0.66483	0.720327	0.722379	0.912363	0.887754	0.582452	0.850322	0.972689	0.901513
Blastocatella	0.54674	0.412118	0.532898	-0.326514	0.334898	0.409152	0.261607	0.41682	0.276319	0.527634	0.516434	0.420519	0.912363	0.824604	0.680509	0.816773	0.933453	0.819374
Alkanindiges	-0.342327	0.206056	0.594867	0.675999	-0.0800028	0.206033	0.506568	0.69529	0.212951	0.140458	0.880252	0.695323	0.912363	0.884399	0.583411	0.647379	0.972689	0.881994
Nitratireductor	-0.273861	0.812985	-0.714639	-0.576313	0.966592	0.817626	0.599478	0.0491915	0.110528	0.231238	0.00165553	0.0468576	0.912363	0.258814	0.420403	0.647379	0.0123631	0.249369
Nodosilinea.PCC.7104	-0.342327	0.206056	0.594867	0.675999	-0.0800028	0.206033	0.506568	0.69529	0.212951	0.140458	0.880252	0.695323	0.912363	0.884399	0.583411	0.647379	0.972689	0.881994
Umezawaea	0.581312	0.28174	0.182097	-0.439511	0.0531241	0.271664	0.226252	0.588572	0.729873	0.383183	0.920389	0.602528	0.912363	0.884399	0.886958	0.724138	0.978135	0.881994
Sedimentibacter	0.201848	-0.578123	-0.0373689	-0.0570585	-0.0875709	-0.57458	0.70134	0.229427	0.943973	0.914505	0.868979	0.232976	0.927773	0.698847	0.981616	0.972908	0.972689	0.709657
BSV13	-0.609936	0.177672	-0.736466	0.0573375	0.475253	0.179611	0.198551	0.736296	0.0950238	0.914088	0.340792	0.733481	0.912363	0.90908	0.420403	0.972908	0.834851	0.91046
Lacihabitans	-0.318185	0.385302	-0.702474	-0.39627	0.360089	0.39174	0.53883	0.450648	0.119614	0.436709	0.483212	0.442448	0.912363	0.824604	0.446624	0.756679	0.912425	0.819374
Sphingobium	-0.273861	0.812985	-0.714639	-0.576313	0.966592	0.817626	0.599478	0.0491915	0.110528	0.231238	0.00165553	0.0468576	0.912363	0.258814	0.420403	0.647379	0.0123631	0.249369
Desulfosporosinus	-0.875706	0.0473964	-0.716116	0.358871	0.177095	0.051468	0.0222133	0.928959	0.109446	0.484802	0.737135	0.922866	0.912363	0.980359	0.420403	0.804455	0.972689	0.979705
Aetherobacter	-0.175651	-0.163177	-0.301882	-0.0350609	-0.313989	-0.15892	0.739233	0.757406	0.560932	0.94743	0.544495	0.763627	0.940663	0.925275	0.839461	0.9748	0.958559	0.927977
Tepidisphaera	0.922138	-0.144523	0.465348	-0.468555	-0.20507	-0.152775	0.00885761	0.784725	0.352364	0.348601	0.696707	0.772621	0.912363	0.934005	0.769549	0.710513	0.972689	0.934003
X966.1	0.616188	-0.513267	0.331369	-0.277253	-0.182302	-0.509661	0.192698	0.297708	0.52114	0.594776	0.729577	0.301702	0.912363	0.731344	0.839461	0.816773	0.972689	0.738979
DEV008	-0.136931	-0.266	-0.203612	0.0404977	-0.434114	-0.262421	0.795888	0.610411	0.698802	0.939287	0.389735	0.615404	0.940853	0.884399	0.879529	0.972908	0.838396	0.881994
Algoriphagus	0.898317	-0.302566	0.38814	-0.46901	-0.43056	-0.309002	0.0149834	0.560001	0.447027	0.34807	0.394069	0.551249	0.912363	0.884399	0.837817	0.710513	0.838396	0.881994
Paucibacter	-0.434064	0.107734	0.381794	0.619247	-0.253656	0.110288	0.389796	0.839024	0.455135	0.18986	0.627676	0.835238	0.912363	0.956818	0.839461	0.647379	0.972689	0.95596
Phytoactinopolyspora	0.758682	-0.405026	0.353989	-0.269095	-0.305346	-0.413056	0.0803252	0.425682	0.491196	0.6061	0.556216	0.415653	0.912363	0.824604	0.839461	0.817586	0.960351	0.819374
Paenarthrobacter	-0.217291	-0.224723	-0.0729598	0.194505	-0.461082	-0.221077	0.679194	0.66859	0.890755	0.711921	0.357389	0.673787	0.92615	0.884399	0.953651	0.872009	0.838396	0.881994
Chungangia	0.350633	0.255621	0.645676	0.116783	-0.152058	0.245841	0.495605	0.624919	0.166076	0.825621	0.773671	0.638667	0.912363	0.884399	0.548001	0.927822	0.972689	0.881994
DEV114	-0.273861	0.812985	-0.714639	-0.576313	0.966592	0.817626	0.599478	0.0491915	0.110528	0.231238	0.00165553	0.0468576	0.912363	0.258814	0.420403	0.647379	0.0123631	0.249369
Neo.b11	-0.597999	0.00215909	-0.631963	0.197479	0.289225	0.00317496	0.209924	0.996761	0.178252	0.707633	0.578259	0.995238	0.912363	0.996973	0.569176	0.871736	0.960351	0.999161
Nostoc.PCC.7107	0.087949	0.188228	0.514061	0.255608	-0.348466	0.182609	0.868417	0.720992	0.296832	0.624939	0.498458	0.729131	0.949938	0.897364	0.708418	0.829073	0.926852	0.907494
Faecalibacterium	-0.273861	0.812985	-0.714639	-0.576313	0.966592	0.817626	0.599478	0.0491915	0.110528	0.231238	0.00165553	0.0468576	0.912363	0.258814	0.420403	0.647379	0.0123631	0.249369
Kamptonema.PCC.6407	-0.0972148	0.261318	0.714301	0.543616	-0.124409	0.257051	0.854637	0.616945	0.110776	0.264901	0.81435	0.622916	0.949938	0.884399	0.420403	0.673575	0.972689	0.881994
Pseudoduganella	-0.280434	-0.416398	-0.21998	0.216639	-0.494939	-0.41129	0.590376	0.411503	0.675352	0.680125	0.318213	0.417852	0.912363	0.824604	0.879529	0.860355	0.80072	0.819374
Sva0996.marine.group	-0.476702	0.643695	0.173073	0.326465	0.45586	0.646227	0.339111	0.167813	0.742983	0.5277	0.363576	0.165594	0.912363	0.611791	0.892066	0.816773	0.838396	0.603703
Planifilum	0.458944	-0.527243	0.145785	-0.236082	-0.0917151	-0.52311	0.359918	0.282418	0.782871	0.652456	0.862813	0.286908	0.912363	0.731344	0.899428	0.848559	0.972689	0.738979
Prosthecobacter	-0.569188	-0.394811	-0.546976	0.341175	-0.307406	-0.392242	0.238419	0.438554	0.261359	0.508093	0.553416	0.441811	0.912363	0.824604	0.658515	0.809622	0.960351	0.819374
Methanosphaera	-0.479257	-0.378394	-0.307414	0.470396	-0.158694	-0.379535	0.336154	0.459499	0.553404	0.346449	0.763957	0.458033	0.912363	0.824604	0.839461	0.710513	0.972689	0.819374
Seinonella	-0.273861	0.812985	-0.714639	-0.576313	0.966592	0.817626	0.599478	0.0491915	0.110528	0.231238	0.00165553	0.0468576	0.912363	0.258814	0.420403	0.647379	0.0123631	0.249369
Citrobacter	0.616188	0.13862	0.29943	-0.333327	-0.111479	0.127957	0.192698	0.793402	0.564279	0.518527	0.833474	0.809111	0.912363	0.934721	0.839461	0.814472	0.972689	0.941239
Tolypothrix	0.388327	-0.61907	0.107739	-0.191149	-0.484045	-0.61339	0.446789	0.190024	0.839017	0.716768	0.330638	0.195308	0.912363	0.645112	0.931571	0.875629	0.82304	0.650558
Rhodoferax	-0.273861	0.812985	-0.714639	-0.576313	0.966592	0.817626	0.599478	0.0491915	0.110528	0.231238	0.00165553	0.0468576	0.912363	0.258814	0.420403	0.647379	0.0123631	0.249369
Methanosarcina	0.306652	-0.826345	0.0869227	-0.00813059	-0.440062	-0.821927	0.554441	0.0426159	0.869944	0.987804	0.382517	0.0447415	0.912363	0.258814	0.950849	0.99209	0.838396	0.249369
Hydrogenophaga	-0.273861	0.812985	-0.714639	-0.576313	0.966592	0.817626	0.599478	0.0491915	0.110528	0.231238	0.00165553	0.0468576	0.912363	0.258814	0.420403	0.647379	0.0123631	0.249369
Acidovorax	-0.298017	0.271861	-0.637602	-0.327649	0.215827	0.278058	0.566208	0.602254	0.173201	0.526114	0.681286	0.593662	0.912363	0.884399	0.560783	0.816773	0.972689	0.881994
Telmatocola	-0.273861	0.812985	-0.714639	-0.576313	0.966592	0.817626	0.599478	0.0491915	0.110528	0.231238	0.00165553	0.0468576	0.912363	0.258814	0.420403	0.647379	0.0123631	0.249369
Candidatus.Lumbricincola	0.481319	-0.132597	-0.00145855	-0.537507	0.263887	-0.126915	0.333774	0.802271	0.997812	0.271386	0.613358	0.81065	0.912363	0.9361	0.997812	0.673575	0.972689	0.941239
Halocella	-0.677234	0.35329	0.195813	0.688232	0.21855	0.354538	0.139454	0.492113	0.710035	0.130647	0.677395	0.490475	0.912363	0.847019	0.885644	0.647379	0.972689	0.844201
Janthinobacterium	-0.273861	0.812985	-0.714639	-0.576313	0.966592	0.817626	0.599478	0.0491915	0.110528	0.231238	0.00165553	0.0468576	0.912363	0.258814	0.420403	0.647379	0.0123631	0.249369
Crocinitomix	0.383682	-0.146386	0.88787	0.354754	-0.294185	-0.15283	0.452718	0.781989	0.0181548	0.490191	0.571452	0.77254	0.912363	0.934005	0.420403	0.804455	0.960351	0.934003
Roseateles	-0.273861	0.812985	-0.714639	-0.576313	0.966592	0.817626	0.599478	0.0491915	0.110528	0.231238	0.00165553	0.0468576	0.912363	0.258814	0.420403	0.647379	0.0123631	0.249369
Aeromonas	-0.273861	0.812985	-0.714639	-0.576313	0.966592	0.817626	0.599478	0.0491915	0.110528	0.231238	0.00165553	0.0468576	0.912363	0.258814	0.420403	0.647379	0.0123631	0.249369
BD1.7.clade	-0.373298	0.286141	0.535828	0.631261	0.0104561	0.286557	0.466062	0.582503	0.273179	0.178884	0.984316	0.58193	0.912363	0.884399	0.678554	0.647379	0.999138	0.881994
Candidatus.Protochlamydia	-0.60476	0.274469	-0.781696	-0.0238692	0.572205	0.276896	0.203451	0.598635	0.0662829	0.964203	0.235368	0.595271	0.912363	0.884399	0.420403	0.985488	0.69411	0.881994
OLB8	-0.273861	0.812985	-0.714639	-0.576313	0.966592	0.817626	0.599478	0.0491915	0.110528	0.231238	0.00165553	0.0468576	0.912363	0.258814	0.420403	0.647379	0.0123631	0.249369
Dysgonomonas	0.616188	-0.513267	0.331369	-0.277253	-0.182302	-0.509661	0.192698	0.297708	0.52114	0.594776	0.729577	0.301702	0.912363	0.731344	0.839461	0.816773	0.972689	0.738979
Caldicoprobacter	-0.606356	0.256982	-0.774224	-0.00897862	0.555008	0.259323	0.201934	0.623012	0.0707081	0.986532	0.252969	0.619736	0.912363	0.884399	0.420403	0.99209	0.722991	0.881994
Symbiobacterium	0.555343	0.356129	0.116129	-0.491923	0.141948	0.346494	0.252621	0.488389	0.82659	0.321636	0.788508	0.501058	0.912363	0.84611	0.925135	0.710513	0.972689	0.856052
Pseudochrobactrum	-0.342327	0.206056	0.594867	0.675999	-0.0800028	0.206033	0.506568	0.69529	0.212951	0.140458	0.880252	0.695323	0.912363	0.884399	0.583411	0.647379	0.972689	0.881994
Labilithrix	-0.273861	0.812985	-0.714639	-0.576313	0.966592	0.817626	0.599478	0.0491915	0.110528	0.231238	0.00165553	0.0468576	0.912363	0.258814	0.420403	0.647379	0.0123631	0.249369
Bacteriovorax	-0.485384	0.233915	0.47517	0.732268	-0.00235584	0.234204	0.329101	0.655527	0.340888	0.0979249	0.996466	0.655117	0.912363	0.884399	0.75717	0.647379	0.999138	0.881994
Parvibaculum	-0.488834	0.750096	0.0121266	0.17962	0.610599	0.75334	0.325154	0.0858747	0.981811	0.733468	0.197927	0.0837583	0.912363	0.368148	0.996883	0.882576	0.632	0.360233
Lentimicrobium	-0.273861	0.812985	-0.714639	-0.576313	0.966592	0.817626	0.599478	0.0491915	0.110528	0.231238	0.00165553	0.0468576	0.912363	0.258814	0.420403	0.647379	0.0123631	0.249369
Yersinia	-0.479257	-0.378394	-0.307414	0.470396	-0.158694	-0.379535	0.336154	0.459499	0.553404	0.346449	0.763957	0.458033	0.912363	0.824604	0.839461	0.710513	0.972689	0.819374
Gallionella	-0.479257	-0.378394	-0.307414	0.470396	-0.158694	-0.379535	0.336154	0.459499	0.553404	0.346449	0.763957	0.458033	0.912363	0.824604	0.839461	0.710513	0.972689	0.819374
Prevotella	-0.273861	0.812985	-0.714639	-0.576313	0.966592	0.817626	0.599478	0.0491915	0.110528	0.231238	0.00165553	0.0468576	0.912363	0.258814	0.420403	0.647379	0.0123631	0.249369
Methylophilus	-0.273861	0.812985	-0.714639	-0.576313	0.966592	0.817626	0.599478	0.0491915	0.110528	0.231238	0.00165553	0.0468576	0.912363	0.258814	0.420403	0.647379	0.0123631	0.249369
Risungbinella	-0.395731	0.348366	0.485315	0.591584	0.0826854	0.349131	0.43739	0.49859	0.329181	0.216143	0.876255	0.497582	0.912363	0.851835	0.750319	0.647379	0.972689	0.853261
Zavarzinella	-0.273861	0.812985	-0.714639	-0.576313	0.966592	0.817626	0.599478	0.0491915	0.110528	0.231238	0.00165553	0.0468576	0.912363	0.258814	0.420403	0.647379	0.0123631	0.249369
SM1A02	0.213117	-0.230477	-0.231139	-0.366099	0.28989	-0.224873	0.685165	0.660406	0.659466	0.475385	0.577346	0.668377	0.92615	0.884399	0.879529	0.797476	0.960351	0.881994
Subdoligranulum	-0.273861	0.812985	-0.714639	-0.576313	0.966592	0.817626	0.599478	0.0491915	0.110528	0.231238	0.00165553	0.0468576	0.912363	0.258814	0.420403	0.647379	0.0123631	0.249369
Arsenicitalea	-0.273861	0.812985	-0.714639	-0.576313	0.966592	0.817626	0.599478	0.0491915	0.110528	0.231238	0.00165553	0.0468576	0.912363	0.258814	0.420403	0.647379	0.0123631	0.249369
Mycoavidus	-0.479257	-0.378394	-0.307414	0.470396	-0.158694	-0.379535	0.336154	0.459499	0.553404	0.346449	0.763957	0.458033	0.912363	0.824604	0.839461	0.710513	0.972689	0.819374
Actinomadura	-0.136931	-0.266	-0.203612	0.0404977	-0.434114	-0.262421	0.795888	0.610411	0.698802	0.939287	0.389735	0.615404	0.940853	0.884399	0.879529	0.972908	0.838396	0.881994
Rurimicrobium	-0.273861	0.812985	-0.714639	-0.576313	0.966592	0.817626	0.599478	0.0491915	0.110528	0.231238	0.00165553	0.0468576	0.912363	0.258814	0.420403	0.647379	0.0123631	0.249369
Methanobrevibacter	-0.342327	0.206056	0.594867	0.675999	-0.0800028	0.206033	0.506568	0.69529	0.212951	0.140458	0.880252	0.695323	0.912363	0.884399	0.583411	0.647379	0.972689	0.881994
Schlesneria	0.576694	-0.369017	0.20211	-0.392668	-0.00201322	-0.364453	0.230856	0.4716	0.700964	0.44127	0.99698	0.477525	0.912363	0.826802	0.879529	0.756679	0.999138	0.837477
Akkermansia	-0.479257	-0.378394	-0.307414	0.470396	-0.158694	-0.379535	0.336154	0.459499	0.553404	0.346449	0.763957	0.458033	0.912363	0.824604	0.839461	0.710513	0.972689	0.819374
Actinokineospora	-0.479257	-0.378394	-0.307414	0.470396	-0.158694	-0.379535	0.336154	0.459499	0.553404	0.346449	0.763957	0.458033	0.912363	0.824604	0.839461	0.710513	0.972689	0.819374
Emticicia	-0.045047	0.273608	0.39511	0.132476	0.313989	0.278473	0.932475	0.599829	0.438176	0.802449	0.544494	0.593088	0.971198	0.884399	0.837221	0.917367	0.958559	0.881994
Plot4.2H12	-0.136931	-0.266	-0.203612	0.0404977	-0.434114	-0.262421	0.795888	0.610411	0.698802	0.939287	0.389735	0.615404	0.940853	0.884399	0.879529	0.972908	0.838396	0.881994
Candidatus.Trichorickettsia	-0.651258	-0.251209	-0.673369	0.290462	-0.0801023	-0.248605	0.161224	0.631113	0.142608	0.576561	0.880104	0.634776	0.912363	0.884399	0.506377	0.816773	0.972689	0.881994
Flexibacter	-0.228753	0.190815	0.611374	0.549704	0.00372074	0.192434	0.662855	0.717252	0.197198	0.258497	0.994419	0.714912	0.92615	0.895115	0.583411	0.673575	0.999138	0.894606
Verticiella	-0.342327	0.206056	0.594867	0.675999	-0.0800028	0.206033	0.506568	0.69529	0.212951	0.140458	0.880252	0.695323	0.912363	0.884399	0.583411	0.647379	0.972689	0.881994
Clostridium.sensu.stricto.10	-0.44747	0.514614	0.327055	0.460891	0.285422	0.516347	0.373594	0.296221	0.526909	0.357615	0.583493	0.294313	0.912363	0.731344	0.839461	0.713689	0.960351	0.738979
Uliginosibacterium	-0.388901	0.0173239	0.00660431	0.32205	-0.285651	0.0217521	0.446057	0.974017	0.990094	0.533625	0.583177	0.967377	0.912363	0.996973	0.997812	0.816773	0.960351	0.995323
Proteiniphilum	-0.182048	-0.145113	-0.318363	-0.0480703	-0.292673	-0.140745	0.729945	0.783859	0.538589	0.92795	0.573526	0.790277	0.940663	0.934005	0.839461	0.972908	0.960351	0.939705
Denitratisoma	-0.273861	0.812985	-0.714639	-0.576313	0.966592	0.817626	0.599478	0.0491915	0.110528	0.231238	0.00165553	0.0468576	0.912363	0.258814	0.420403	0.647379	0.0123631	0.249369
Anaerocolumna	-0.273861	0.812985	-0.714639	-0.576313	0.966592	0.817626	0.599478	0.0491915	0.110528	0.231238	0.00165553	0.0468576	0.912363	0.258814	0.420403	0.647379	0.0123631	0.249369
Candidatus.Megaira	0.567384	-0.341522	0.177954	-0.412089	0.0306294	-0.336802	0.240251	0.507634	0.735887	0.416857	0.95407	0.513899	0.912363	0.860932	0.891925	0.74808	0.988711	0.871558
Stackebrandtia	-0.273861	0.812985	-0.714639	-0.576313	0.966592	0.817626	0.599478	0.0491915	0.110528	0.231238	0.00165553	0.0468576	0.912363	0.258814	0.420403	0.647379	0.0123631	0.249369
Fusobacterium	-0.273861	0.812985	-0.714639	-0.576313	0.966592	0.817626	0.599478	0.0491915	0.110528	0.231238	0.00165553	0.0468576	0.912363	0.258814	0.420403	0.647379	0.0123631	0.249369
Pelomonas	-0.273861	0.812985	-0.714639	-0.576313	0.966592	0.817626	0.599478	0.0491915	0.110528	0.231238	0.00165553	0.0468576	0.912363	0.258814	0.420403	0.647379	0.0123631	0.249369
Syntrophaceticus	-0.479257	-0.378394	-0.307414	0.470396	-0.158694	-0.379535	0.336154	0.459499	0.553404	0.346449	0.763957	0.458033	0.912363	0.824604	0.839461	0.710513	0.972689	0.819374
Fonticella	-0.273861	0.812985	-0.714639	-0.576313	0.966592	0.817626	0.599478	0.0491915	0.110528	0.231238	0.00165553	0.0468576	0.912363	0.258814	0.420403	0.647379	0.0123631	0.249369
Melittangium	-0.273861	0.812985	-0.714639	-0.576313	0.966592	0.817626	0.599478	0.0491915	0.110528	0.231238	0.00165553	0.0468576	0.912363	0.258814	0.420403	0.647379	0.0123631	0.249369
X.Desulfobacterium..catecholicum.group	-0.273861	0.812985	-0.714639	-0.576313	0.966592	0.817626	0.599478	0.0491915	0.110528	0.231238	0.00165553	0.0468576	0.912363	0.258814	0.420403	0.647379	0.0123631	0.249369
Lactococcus	0.616188	-0.513267	0.331369	-0.277253	-0.182302	-0.509661	0.192698	0.297708	0.52114	0.594776	0.729577	0.301702	0.912363	0.731344	0.839461	0.816773	0.972689	0.738979
Ruminococcus	-0.548846	0.511469	-0.846824	-0.237106	0.788832	0.515021	0.259396	0.299697	0.0333974	0.651006	0.0621799	0.295772	0.912363	0.731344	0.420403	0.848559	0.27682	0.738979
Clostridium.sensu.stricto.9	-0.273861	0.812985	-0.714639	-0.576313	0.966592	0.817626	0.599478	0.0491915	0.110528	0.231238	0.00165553	0.0468576	0.912363	0.258814	0.420403	0.647379	0.0123631	0.249369
Thermobacillus	-0.479257	-0.378394	-0.307414	0.470396	-0.158694	-0.379535	0.336154	0.459499	0.553404	0.346449	0.763957	0.458033	0.912363	0.824604	0.839461	0.710513	0.972689	0.819374
Candidatus.Endoecteinascidia	-0.273861	0.812985	-0.714639	-0.576313	0.966592	0.817626	0.599478	0.0491915	0.110528	0.231238	0.00165553	0.0468576	0.912363	0.258814	0.420403	0.647379	0.0123631	0.249369
Listeria	-0.136931	-0.266	-0.203612	0.0404977	-0.434114	-0.262421	0.795888	0.610411	0.698802	0.939287	0.389735	0.615404	0.940853	0.884399	0.879529	0.972908	0.838396	0.881994
Ketobacter	0.607515	-0.475498	0.297075	-0.309883	-0.133488	-0.471617	0.200837	0.340507	0.567497	0.550054	0.800958	0.345024	0.912363	0.769048	0.839461	0.816773	0.972689	0.7711
Staphylococcus	0.616188	-0.513267	0.331369	-0.277253	-0.182302	-0.509661	0.192698	0.297708	0.52114	0.594776	0.729577	0.301702	0.912363	0.731344	0.839461	0.816773	0.972689	0.738979
Chitinibacter	0.616188	-0.513267	0.331369	-0.277253	-0.182302	-0.509661	0.192698	0.297708	0.52114	0.594776	0.729577	0.301702	0.912363	0.731344	0.839461	0.816773	0.972689	0.738979
Chiayiivirga	-0.136931	-0.266	-0.203612	0.0404977	-0.434114	-0.262421	0.795888	0.610411	0.698802	0.939287	0.389735	0.615404	0.940853	0.884399	0.879529	0.972908	0.838396	0.881994
Nitrosomonas	-0.273861	0.812985	-0.714639	-0.576313	0.966592	0.817626	0.599478	0.0491915	0.110528	0.231238	0.00165553	0.0468576	0.912363	0.258814	0.420403	0.647379	0.0123631	0.249369
Turneriella	-0.0186112	-0.634134	-0.100384	0.18016	-0.192231	-0.632247	0.972086	0.1763	0.84993	0.732683	0.715206	0.177996	0.985333	0.618384	0.934721	0.882576	0.972689	0.615192
Caldimonas	-0.136931	-0.266	-0.203612	0.0404977	-0.434114	-0.262421	0.795888	0.610411	0.698802	0.939287	0.389735	0.615404	0.940853	0.884399	0.879529	0.972908	0.838396	0.881994
Abditibacterium	-0.342327	0.206056	0.594867	0.675999	-0.0800028	0.206033	0.506568	0.69529	0.212951	0.140458	0.880252	0.695323	0.912363	0.884399	0.583411	0.647379	0.972689	0.881994
Fibrella	-0.342327	0.206056	0.594867	0.675999	-0.0800028	0.206033	0.506568	0.69529	0.212951	0.140458	0.880252	0.695323	0.912363	0.884399	0.583411	0.647379	0.972689	0.881994
Azospira	-0.342327	0.206056	0.594867	0.675999	-0.0800028	0.206033	0.506568	0.69529	0.212951	0.140458	0.880252	0.695323	0.912363	0.884399	0.583411	0.647379	0.972689	0.881994
Larkinella	-0.273861	0.812985	-0.714639	-0.576313	0.966592	0.817626	0.599478	0.0491915	0.110528	0.231238	0.00165553	0.0468576	0.912363	0.258814	0.420403	0.647379	0.0123631	0.249369
Xanthomonas	-0.479257	-0.378394	-0.307414	0.470396	-0.158694	-0.379535	0.336154	0.459499	0.553404	0.346449	0.763957	0.458033	0.912363	0.824604	0.839461	0.710513	0.972689	0.819374
Phytohabitans	-0.479257	-0.378394	-0.307414	0.470396	-0.158694	-0.379535	0.336154	0.459499	0.553404	0.346449	0.763957	0.458033	0.912363	0.824604	0.839461	0.710513	0.972689	0.819374
Rickettsia	-0.273861	0.812985	-0.714639	-0.576313	0.966592	0.817626	0.599478	0.0491915	0.110528	0.231238	0.00165553	0.0468576	0.912363	0.258814	0.420403	0.647379	0.0123631	0.249369
Clostridium.sensu.stricto.3	-0.273861	0.812985	-0.714639	-0.576313	0.966592	0.817626	0.599478	0.0491915	0.110528	0.231238	0.00165553	0.0468576	0.912363	0.258814	0.420403	0.647379	0.0123631	0.249369
Limisphaera	-0.273861	0.812985	-0.714639	-0.576313	0.966592	0.817626	0.599478	0.0491915	0.110528	0.231238	0.00165553	0.0468576	0.912363	0.258814	0.420403	0.647379	0.0123631	0.249369
Pasteuria	-0.136931	-0.266	-0.203612	0.0404977	-0.434114	-0.262421	0.795888	0.610411	0.698802	0.939287	0.389735	0.615404	0.940853	0.884399	0.879529	0.972908	0.838396	0.881994
Methanobacterium	-0.136931	-0.266	-0.203612	0.0404977	-0.434114	-0.262421	0.795888	0.610411	0.698802	0.939287	0.389735	0.615404	0.940853	0.884399	0.879529	0.972908	0.838396	0.881994
ZOR0006	-0.273861	0.812985	-0.714639	-0.576313	0.966592	0.817626	0.599478	0.0491915	0.110528	0.231238	0.00165553	0.0468576	0.912363	0.258814	0.420403	0.647379	0.0123631	0.249369
UCG.004	-0.273861	0.812985	-0.714639	-0.576313	0.966592	0.817626	0.599478	0.0491915	0.110528	0.231238	0.00165553	0.0468576	0.912363	0.258814	0.420403	0.647379	0.0123631	0.249369
Rhodovastum	-0.273861	0.812985	-0.714639	-0.576313	0.966592	0.817626	0.599478	0.0491915	0.110528	0.231238	0.00165553	0.0468576	0.912363	0.258814	0.420403	0.647379	0.0123631	0.249369
Cellulosilyticum	-0.479257	-0.378394	-0.307414	0.470396	-0.158694	-0.379535	0.336154	0.459499	0.553404	0.346449	0.763957	0.458033	0.912363	0.824604	0.839461	0.710513	0.972689	0.819374
Candidatus.Amoebophilus	-0.342327	0.206056	0.594867	0.675999	-0.0800028	0.206033	0.506568	0.69529	0.212951	0.140458	0.880252	0.695323	0.912363	0.884399	0.583411	0.647379	0.972689	0.881994
Sinibacillus	-0.273861	0.812985	-0.714639	-0.576313	0.966592	0.817626	0.599478	0.0491915	0.110528	0.231238	0.00165553	0.0468576	0.912363	0.258814	0.420403	0.647379	0.0123631	0.249369
BRH.c8a	-0.273861	0.812985	-0.714639	-0.576313	0.966592	0.817626	0.599478	0.0491915	0.110528	0.231238	0.00165553	0.0468576	0.912363	0.258814	0.420403	0.647379	0.0123631	0.249369
Huakuichenia	-0.273861	0.812985	-0.714639	-0.576313	0.966592	0.817626	0.599478	0.0491915	0.110528	0.231238	0.00165553	0.0468576	0.912363	0.258814	0.420403	0.647379	0.0123631	0.249369
Sporobacter	-0.471734	0.61724	0.20754	0.357097	0.419711	0.619604	0.344887	0.19172	0.69316	0.487123	0.407401	0.18953	0.912363	0.645112	0.879529	0.804455	0.849669	0.646942
Candidatus.Caldatribacterium	-0.342327	0.206056	0.594867	0.675999	-0.0800028	0.206033	0.506568	0.69529	0.212951	0.140458	0.880252	0.695323	0.912363	0.884399	0.583411	0.647379	0.972689	0.881994
Erysipelatoclostridium	0.616188	-0.513267	0.331369	-0.277253	-0.182302	-0.509661	0.192698	0.297708	0.52114	0.594776	0.729577	0.301702	0.912363	0.731344	0.839461	0.816773	0.972689	0.738979
Haloplasma	-0.136931	-0.266	-0.203612	0.0404977	-0.434114	-0.262421	0.795888	0.610411	0.698802	0.939287	0.389735	0.615404	0.940853	0.884399	0.879529	0.972908	0.838396	0.881994
IMCC26134	-0.479257	-0.378394	-0.307414	0.470396	-0.158694	-0.379535	0.336154	0.459499	0.553404	0.346449	0.763957	0.458033	0.912363	0.824604	0.839461	0.710513	0.972689	0.819374
Anaerospora	-0.273861	0.812985	-0.714639	-0.576313	0.966592	0.817626	0.599478	0.0491915	0.110528	0.231238	0.00165553	0.0468576	0.912363	0.258814	0.420403	0.647379	0.0123631	0.249369
Chthonomonas	-0.273861	0.812985	-0.714639	-0.576313	0.966592	0.817626	0.599478	0.0491915	0.110528	0.231238	0.00165553	0.0468576	0.912363	0.258814	0.420403	0.647379	0.0123631	0.249369
Singulisphaera	-0.273861	0.812985	-0.714639	-0.576313	0.966592	0.817626	0.599478	0.0491915	0.110528	0.231238	0.00165553	0.0468576	0.912363	0.258814	0.420403	0.647379	0.0123631	0.249369
Defluviitaleaceae.UCG.011	-0.136931	-0.266	-0.203612	0.0404977	-0.434114	-0.262421	0.795888	0.610411	0.698802	0.939287	0.389735	0.615404	0.940853	0.884399	0.879529	0.972908	0.838396	0.881994
Papillibacter	-0.273861	0.812985	-0.714639	-0.576313	0.966592	0.817626	0.599478	0.0491915	0.110528	0.231238	0.00165553	0.0468576	0.912363	0.258814	0.420403	0.647379	0.0123631	0.249369
Thermincola	-0.273861	0.812985	-0.714639	-0.576313	0.966592	0.817626	0.599478	0.0491915	0.110528	0.231238	0.00165553	0.0468576	0.912363	0.258814	0.420403	0.647379	0.0123631	0.249369
UCG.003	-0.342327	0.206056	0.594867	0.675999	-0.0800028	0.206033	0.506568	0.69529	0.212951	0.140458	0.880252	0.695323	0.912363	0.884399	0.583411	0.647379	0.972689	0.881994
Candidatus.Bealeia	-0.273861	0.812985	-0.714639	-0.576313	0.966592	0.817626	0.599478	0.0491915	0.110528	0.231238	0.00165553	0.0468576	0.912363	0.258814	0.420403	0.647379	0.0123631	0.249369
CL500.3	-0.479257	-0.378394	-0.307414	0.470396	-0.158694	-0.379535	0.336154	0.459499	0.553404	0.346449	0.763957	0.458033	0.912363	0.824604	0.839461	0.710513	0.972689	0.819374
